# Supplementary material
Source: HighWire-hosted journal article supplement (https://erj.ersjournals.com/content/58/4/2100090)
Supplement: inline-supplementary-material-1 [file inline-supplementary-material-1.pdf]

## ANNEX A: COMPLETE SEARCH HISTORY

### *PubMed:*

1. (((("tuberculosi"[All Fields] OR "tuberculosis"[MeSH Terms]) OR "tuberculosis"[All Fields]) OR "tuberculoses"[All Fields]) OR "tuberculosis s"[All Fields]) AND (((((((("diagnosis"[MeSH Subheading] OR "diagnosis"[All Fields]) OR "screening"[All Fields]) OR "mass screening"[MeSH Terms]) OR ("mass"[All Fields] AND "screening"[All Fields])) OR "mass screening"[All Fields]) OR "screen"[All Fields]) OR "screenings"[All Fields]) OR "screened"[All Fields]) OR "screens"[All Fields]) AND (((("diagnosis"[MeSH Terms] OR "diagnosis"[All Fields]) OR "diagnostic"[All Fields]) OR "diagnostical"[All Fields]) OR "diagnostically"[All Fields]) OR "diagnostics"[All Fields]) AND (("yield"[All Fields] OR "yielded"[All Fields]) OR "yielding"[All Fields]) OR "yields"[All Fields])
2. (((("tuberculosi"[All Fields] OR "tuberculosis"[MeSH Terms]) OR "tuberculosis"[All Fields]) OR "tuberculoses"[All Fields]) OR "tuberculosis s"[All Fields]) AND "case-finding"[All Fields] AND (((((((("effect"[All Fields] OR "effecting"[All Fields]) OR "effective"[All Fields]) OR "effectively"[All Fields]) OR "effectiveness"[All Fields]) OR "effectivenesses"[All Fields]) OR "effectives"[All Fields]) OR "effectivities"[All Fields]) OR "effectivity"[All Fields]) OR "effects"[All Fields])
3. (((("tuberculosi"[All Fields] OR "tuberculosis"[MeSH Terms]) OR "tuberculosis"[All Fields]) OR "tuberculoses"[All Fields]) OR "tuberculosis s"[All Fields]) AND (("ieee int conf automation sci eng case"[Journal] OR "case phila"[Journal]) OR "case"[All Fields]) AND (((((((("diagnosis"[MeSH Subheading] OR "diagnosis"[All Fields]) OR "findings"[All Fields]) OR "diagnosis"[MeSH Terms]) OR "finds"[All Fields]) OR "signs and symptoms"[MeSH Terms]) OR ("signs"[All Fields] AND "symptoms"[All Fields])) OR "signs and symptoms"[All Fields]) OR "finding"[All Fields]) AND (((((((("effect"[All Fields] OR "effecting"[All Fields]) OR "effective"[All Fields]) OR "effectively"[All Fields]) OR "effectiveness"[All Fields]) OR "effectivenesses"[All Fields]) OR "effectives"[All Fields]) OR "effectivities"[All Fields]) OR "effectivity"[All Fields]) OR "effects"[All Fields])

4. (((("tuberculosi"[All Fields] OR "tuberculosis"[MeSH Terms]) OR "tuberculosis"[All Fields]) OR "tuberculoses"[All Fields]) OR "tuberculosis s"[All Fields]) AND (((((((((((((((((((("activable"[All Fields] OR "activate"[All Fields]) OR "activated"[All Fields]) OR "activates"[All Fields]) OR "activating"[All Fields]) OR "activation"[All Fields]) OR "activations"[All Fields]) OR "activator"[All Fields]) OR "activator s"[All Fields]) OR "activators"[All Fields]) OR "active"[All Fields]) OR "acted"[All Fields]) OR "actively"[All Fields]) OR "actives"[All Fields]) OR "activities"[All Fields]) OR "activity s"[All Fields]) OR "activitys"[All Fields]) OR "activity"[All Fields]) AND "case-finding"[All Fields])
  
5. (((("tuberculosi"[All Fields] OR "tuberculosis"[MeSH Terms]) OR "tuberculosis"[All Fields]) OR "tuberculoses"[All Fields]) OR "tuberculosis s"[All Fields]) AND (((((((((((((((((((("activable"[All Fields] OR "activate"[All Fields]) OR "activated"[All Fields]) OR "activates"[All Fields]) OR "activating"[All Fields]) OR "activation"[All Fields]) OR "activations"[All Fields]) OR "activator"[All Fields]) OR "activator s"[All Fields]) OR "activators"[All Fields]) OR "active"[All Fields]) OR "acted"[All Fields]) OR "actively"[All Fields]) OR "actives"[All Fields]) OR "activities"[All Fields]) OR "activity s"[All Fields]) OR "activitys"[All Fields]) OR "activity"[All Fields]) AND (("ieeee int conf automation sci eng case"[Journal] OR "case phila"[Journal]) OR "case"[All Fields]) AND (((((((("diagnosis"[MeSH Subheading] OR "diagnosis"[All Fields]) OR "findings"[All Fields]) OR "diagnosis"[MeSH Terms]) OR "finds"[All Fields]) OR "signs and symptoms"[MeSH Terms]) OR ("signs"[All Fields] AND "symptoms"[All Fields])) OR "signs and symptoms"[All Fields]) OR "finding"[All Fields])

*Embase:*

1. ('tuberculosis screening' OR (('tuberculosis'/exp OR tuberculosis) AND ('screening'/exp OR screening))) AND ('diagnostic value'/exp OR 'diagnostic value')
2. 'tuberculosis case-finding effectiveness' OR (('tuberculosis'/exp OR tuberculosis) AND ('case finding'/exp OR 'case finding') AND effectiveness)
3. 'tuberculosis active case-finding' OR (('tuberculosis'/exp OR tuberculosis) AND active AND ('case finding'/exp OR 'case finding'))

*Cochrane:*

1. (tuberculosis screening and diagnostic yield):ti,ab,kw
2. (tuberculosis case-finding effectiveness):ti,ab,kw
3. (tuberculosis case finding effectiveness):ti,ab,kw
4. (tuberculosis active case-finding):ti,ab,kw
5. (tuberculosis active case finding):ti,ab,kw
