# Supplementary material
Source: HighWire-hosted journal article supplement (https://erj.ersjournals.com/content/58/4/2100090)
Supplement: inline-supplementary-material-2 [file inline-supplementary-material-2.pdf]

## ANNEX B: SUMMARIES OF INCLUDED STUDIES

**Table 3. Characteristics of included studies.**

| Study                                 | Country  | Year(s) of study | Population type  | Population screened | Number of Cases | Brief study description and method of screening                                                                                                                                                                                                                                      |
|---------------------------------------|----------|------------------|------------------|---------------------|-----------------|--------------------------------------------------------------------------------------------------------------------------------------------------------------------------------------------------------------------------------------------------------------------------------------|
| <b>Abrahao et al.<sup>37</sup></b>    | Brazil   | 2000-2001        | At-risk (Prison) | 1,052               | 54              | A population of prison inmates in Sao Paulo were screened using symptom screening, TST, and sputum-smear and culture.                                                                                                                                                                |
| <b>Adane et al.<sup>38</sup></b>      | Ethiopia | 2013-2014        | At-risk (Prison) | 9,299               | 32              | A population of prison inmates in Tigray were initially screened for cough of any duration, followed by a full symptom screening (cough more than two weeks with at least one other symptom). Sputum samples were collected from presumptive cases for culture and smear-microscopy. |
| <b>Akhtar et al.<sup>39</sup></b>     | Pakistan | 2002             | General          | 5,479               | 18              | Door-to-door screening of households in a peri-urban neighborhood of Karachi where sputum samples were collected from patients reporting cough of two or more weeks for smear microscopy and culture.                                                                                |
| <b>Al-Darraji et al.<sup>40</sup></b> | Malaysia | 2012-2013        | At-risk (prison) | 442                 | 48              | Systematic screening of consenting inmates at a Malaysian prison using two sputum samples analyzed                                                                                                                                                                                   |

by GeneXpert MTB/RIF, smear microscopy and liquid culture.

|                                       |          |           |                        |         |       |                                                                                                                                                                                                                                                               |
|---------------------------------------|----------|-----------|------------------------|---------|-------|---------------------------------------------------------------------------------------------------------------------------------------------------------------------------------------------------------------------------------------------------------------|
| <b>Alemayahu et al.</b> <sup>41</sup> | Ethiopia | 2012      | At-Risk (PLHIV)        | 250     | 15    | A cross-sectional study of active case finding and detection of drug resistance among PLHIV using sputum smear microscopy and Mycobacteria culture, as well as PCR-based genotyping on culture-positive isolates.                                             |
| <b>Ali et al.</b> <sup>42</sup>       | Ethiopia | 2013      | At-risk (Prison)       | 15,495  | 71    | Prison inmates were screened for symptoms (cough of two weeks duration, sputum production, chest pain, recent loss of appetite, and weight loss), past TB history, or HIV. TB suspects provided sputum for smear microscopy and culture.                      |
| <b>Andre et al.</b> <sup>43</sup>     | DR Congo | 2014-2016 | General                | 617,432 | 3,455 | An investigation of the effect of using volunteer screeners in active TB case-finding of community and high-risk groups in DR Congo. Volunteer screeners referred people with prolonged cough to a local clinic, where sputum-smear microscopy was performed. |
| <b>Andre et al.</b> <sup>43</sup>     |          |           | At-Risk (Marginalized) | 33,002  | 845   |                                                                                                                                                                                                                                                               |
| <b>Anger et al.</b> <sup>44</sup>     | USA      | 1997-2003 | At-Risk (HHC)          | 27,293  | 268   | A retrospective cohort study of close contacts of patients with TB who underwent symptom screening, TST, and CXR.                                                                                                                                             |

|                                      |                       |           |                    |         |     |                                                                                                                                                                                                                                                              |
|--------------------------------------|-----------------------|-----------|--------------------|---------|-----|--------------------------------------------------------------------------------------------------------------------------------------------------------------------------------------------------------------------------------------------------------------|
| <b>Aunsborg et al.</b> <sup>45</sup> | Guinea-Bissau         | 2014      | At-Risk (PLHIV)    | 164     | 22  | A feasibility study of using the clinical Bandim TBscore for TB case finding among PLHIV.                                                                                                                                                                    |
| <b>Aye et al.</b> <sup>46</sup>      | Myanmar               | 2014-2016 | At-Risk (HHC)      | 56,709  | 74  | An assessment of the effect of ACF of TB by a household and community intervention using symptom screening (prolonged cough, hemoptysis, weight loss, fever, night sweat, and gland enlargement) followed up by CXR, sputum-smear microscopy, and GeneXpert. |
| <b>Aye et al.</b> <sup>46</sup>      |                       |           | General            | 162,881 | 984 |                                                                                                                                                                                                                                                              |
| <b>Ayles et al. #1</b> <sup>47</sup> | South Africa & Zambia | 2006-2010 | At-Risk (HHC)      | 21,493  | 214 | Household contacts of newly diagnosed patients with TB were visited by counsellors three times during the index patient's treatment. Symptom screening was performed, and sputum-smear was used for confirmation.                                            |
| <b>Ayles et al. #2</b> <sup>48</sup> | Zambia                | 2005      | General            | 8,044   | 79  | Households were visited at random in one urban and one rural area and residents provided sputum sample for smear microscopy and culture.                                                                                                                     |
| <b>Badiaga et al.</b> <sup>49</sup>  | France                | 2005      | At-risk (Homeless) | 221     | 2   | A prevalence survey of respiratory illnesses in two homeless shelters in Marseilles using a standardized questionnaire and examined by a doctor. Sputum samples were collected for smear microscopy and culture and CXR was evaluated. If CXR was abnormal   |

|                                         |            |           |                  |        |     |                                                                                                                                                                                                                                                                            |
|-----------------------------------------|------------|-----------|------------------|--------|-----|----------------------------------------------------------------------------------------------------------------------------------------------------------------------------------------------------------------------------------------------------------------------------|
|                                         |            |           |                  |        |     | the subject was referred to the hospital, where they were evaluated by microscopy, PCR, and culture.                                                                                                                                                                       |
| <b>Balcha et al.</b> <sup>50</sup>      | Ethiopia   | 2011      | At-Risk (PLHIV)  | 812    | 145 | This study assessed the rate of TB in PLHIV before starting anti-retro viral therapy (ART) using PCR and sputum smear.                                                                                                                                                     |
| <b>Banu et al. #1</b> <sup>51</sup>     | Bangladesh | 2005-2010 | At-Risk (Prison) | 60,585 | 466 | An assessment of ACF of TB on prevalence and transmission of pulmonary TB at the entry point of and inside Dhaka Central Jail, Bangladesh. Three sputum samples were collected and evaluated using smear microscopy, culture, drug susceptibility testing, and genotyping. |
| <b>Banu et al. #2</b> <sup>52</sup>     | Bangladesh | 2009-2010 | At-risk (Slum)   | 9,877  | 25  | A house-to-house survey was conducted in an urban slum and residents were screened for TB symptoms. Individuals with productive cough for three or more weeks were considered TB suspect and provided sputum for smear microscopy and culture.                             |
| <b>Banu et al. #3</b> <sup>51, 53</sup> | Bangladesh | 2005-2007 | At-risk (Prison) | 11,000 | 245 | Inmates were interviewed by a doctor who examined all TB suspects (cough for more than three weeks). All                                                                                                                                                                   |

|                                     |              |           |                        |        |     |                                                                                                                                                                                                                                |
|-------------------------------------|--------------|-----------|------------------------|--------|-----|--------------------------------------------------------------------------------------------------------------------------------------------------------------------------------------------------------------------------------|
|                                     |              |           |                        |        |     | suspects provided sputum samples for smear microscopy and culture                                                                                                                                                              |
| <b>Basett et al.</b> <sup>54</sup>  | South Africa | 2007-2008 | At-Risk (PLHIV)        | 825    | 158 | An investigation of ACF of TB among patients undergoing ART using symptom screening (cough, fever, night sweats, weight loss, chest pain, and dyspnea) followed up by sputum smear microscopy, PCR, and mycobacterial culture. |
| <b>Berhe et al.</b> <sup>55</sup>   | Ethiopia     | 2011      | General                | 12,175 | 30  | Random samples from urban and rural clusters were selected and screened for symptoms (cough for more than two weeks). Symptomatic individuals provided sputum samples for microscopy and culture.                              |
| <b>Beyanga et al.</b> <sup>56</sup> | Tanzania     | 2016      | At-Risk (HHC)          | 456    | 29  | An investigation of case finding among HHCs of patients with TB in Mwanza City, Tanzania, using fluorescent smear microscopy, GeneXpert, and Löwenstein-Jensen culture.                                                        |
| <b>Bhat et al.</b> <sup>57</sup>    | India        | 2007-2008 | At-risk (Marginalized) | 22,270 | 83  | A prevalence survey of a tribal population using symptom screening (persistent cough, chest pain, fever, hemoptysis). If symptomatic or had a history of                                                                       |

|                                                 |                 |           |                    |           |     |                                                                                                                                                                                                                                                                                                                                             |
|-------------------------------------------------|-----------------|-----------|--------------------|-----------|-----|---------------------------------------------------------------------------------------------------------------------------------------------------------------------------------------------------------------------------------------------------------------------------------------------------------------------------------------------|
|                                                 |                 |           |                    |           |     | TB, sputum was collected for smear microscopy and culture.                                                                                                                                                                                                                                                                                  |
| <b>Bjerregaard-Andersen et al.<sup>58</sup></b> | Guinea-Bissau   | 2006-2007 | General            | 2,989     | 4   | House-to-house screening for symptoms (cough, expectorate, hemoptysis, breathlessness, chest pain, fever, nightly sweats, fatigue, weight loss, and loss of appetite). Individuals with cough or two other symptoms were referred to a physician for further evaluation. Sputum smear and CXR was ordered by physician if deemed necessary. |
| <b>Bogdanova et al.<sup>59</sup></b>            | Russia          | 2013-2017 | General            | 2,410,613 | 684 | A cost effectiveness study of ACF. HHCs were visited by a doctor and referred to CXR. Mass screening was performed by CXR at municipal hospitals or mobile radiology units.                                                                                                                                                                 |
| <b>Bogdanova et al.<sup>59</sup></b>            |                 |           | At-Risk (HHC)      | 8,100     | 61  |                                                                                                                                                                                                                                                                                                                                             |
| <b>Borgen et al.<sup>60</sup></b>               | The Netherlands | 2005      | At-Risk (Contacts) | 15,518    | 12  | A large-scale contact investigation of customers of a supermarket attended by a patient with TB in the Netherlands using TST and/or CXR.                                                                                                                                                                                                    |
| <b>Bozorgmehr et al.<sup>61</sup></b>           | Germany         | 2002-2015 | At-Risk (Refugees) | 119,037   | 98  | An analysis of using country of origin in targeting TB screening in asylum seekers in Germany using symptom screening, CXR, and TST/IGRA confirmed by chest computer scan, sputum test, and culture tests.                                                                                                                                  |

|                                                               |        |           |                  |         |       |                                                                                                                                                                                                                                                                                                                      |
|---------------------------------------------------------------|--------|-----------|------------------|---------|-------|----------------------------------------------------------------------------------------------------------------------------------------------------------------------------------------------------------------------------------------------------------------------------------------------------------------------|
| <b>China Tuberculosis Control Collaboration</b> <sup>62</sup> | China  | 2000      | General          | 365,097 | 1,340 | A nationally representative prevalence survey was undertaken. Adults were considered TB suspect if they had haemoptysis or cough for at least three weeks or abnormal fluorograph. All those with persistent cough or abnormal fluorograph were given CXR and had sputum collected for smear microscopy and culture. |
| <b>Carbone et al.</b> <sup>63</sup>                           | Brazil | 2013      | At-Risk (Prison) | 3,380   | 31    | A cross sectional study of latent and active tuberculosis in a sample of inmates in 12 prisons in Central-West Brazil, using TST on all inmates and sputum smear microscopy and culture on inmates reporting cough of any duration.                                                                                  |
| <b>Cavany et al.</b> <sup>64</sup>                            | The UK | 2012-2015 | At-Risk (HHC)    | 16,495  | 294   | Contact tracing study among TB cases in London over the course of 3 years using symptom screening, TST/IGRA, and CXR.                                                                                                                                                                                                |
| <b>Chen C et al.</b> <sup>65</sup>                            | China  | 2013-2014 | General          | 19,334  | 52    | An evaluation of community based ACF in identifying symptomatic individuals with TB in rural China.                                                                                                                                                                                                                  |
| <b>Chen JO et al.</b> <sup>26</sup>                           | China  | 2013-2015 | General          | 97,521  | 66    | A retrospective cohort study of ACF in ten communities in Yunnan Province, China, using symptom screening                                                                                                                                                                                                            |

(cough or expectoration over 2 weeks, or hemoptysis)  
followed up by CXR.

|                                        |          |           |                          |        |     |                                                                                                                                                                                                                                   |
|----------------------------------------|----------|-----------|--------------------------|--------|-----|-----------------------------------------------------------------------------------------------------------------------------------------------------------------------------------------------------------------------------------|
| <b>Cheng et al.</b> <sup>66</sup>      | Mongolia | 2010      | At-Risk (Health Workers) | 2,269  | 12  | Evaluation of a framework for TB screening among healthcare workers in 28 facilities in Inner Mongolia Autonomous Region, using symptom screening (cough more than two weeks), TST, and CXR.                                      |
| <b>Chheng et al.</b> <sup>67</sup>     | Uganda   | 2002-2007 | At-Risk (Contacts)       | 177    | 18  | Tuberculosis screening among first degree relatives of index TB cases using symptom screening, TST, CXR, sputum smear microscopy, and culture.                                                                                    |
| <b>Corbett et al. #1</b> <sup>68</sup> | Zimbabwe | 2006-2008 | General                  | 10,177 | 392 | A cluster randomized controlled trial of active tuberculosis case finding either by mobile van or door to door screening, using symptom screening (cough more than two weeks) and fluorescence sputum smear microscopy), DETECTB. |
| <b>Corbett et al. #2</b> <sup>69</sup> | Zimbabwe | 2005-2006 | General                  | 8,979  | 79  | An investigation of provider-initiated TB screening based on a previous TB-HIV prevalence survey, using symptom screening (cough of any duration,                                                                                 |

hemoptysis, fever, and night sweats), sputum culture, smear microscopy, and CXR.

|                                       |                    |           |                    |         |       |                                                                                                                                                                                                                                                                  |
|---------------------------------------|--------------------|-----------|--------------------|---------|-------|------------------------------------------------------------------------------------------------------------------------------------------------------------------------------------------------------------------------------------------------------------------|
| <b>Corbett et al. #3<sup>70</sup></b> | Zimbabwe           | 2001-2002 | General            | 4,668   | 27    | A prevalence survey was conducted in 22 small and medium-sized enterprises in Harare. A symptom screening was performed (cough, fever, hemoptysis, night sweats, unintentional weight loss) and sputum was collected for all participants for smear and culture. |
| <b>Cowger et al. <sup>71</sup></b>    | Thailand & Vietnam | 2010-2011 | At-Risk (PLHIV)    | 1,448   | 119   | Evaluation of an algorithm, screening for cough, fever, and night sweats followed up by sputum smear microscopy and CXR, to diagnose and rule out TB in PLHIV in 11 HIV clinics.                                                                                 |
| <b>Crepet et al. <sup>72</sup></b>    | Italy              | 2012-2013 | At-Risk (Migrants) | 3,588   | 3     | A screening for active TB among migrants, using symptom screening (cough more than three weeks, fever, night sweats, weight loss, hemoptysis, and chest pain) and CXR.                                                                                           |
| <b>Creswell et al. <sup>73</sup></b>  | Pakistan           | 2012      | General            | 529,447 | 1,010 | An evaluation of the feasibility of privately initiated systematic TB screening in Pakistan, using a symptom-based quick-screen through a mobile phone app (cough more than three weeks, previous history of TB, or                                              |

|                                    |              |           |                          |        |     |                                                                                                                                                                                                                                                                                     |
|------------------------------------|--------------|-----------|--------------------------|--------|-----|-------------------------------------------------------------------------------------------------------------------------------------------------------------------------------------------------------------------------------------------------------------------------------------|
|                                    |              |           |                          |        |     | family member with TB) followed up by sputum smear microscopy.                                                                                                                                                                                                                      |
| <b>Dabhi et al.<sup>74</sup></b>   | India        | 2014-2015 | At-Risk (Diabetics)      | 957    | 10  | Non-insulin dependent diabetic patients were screened at a diabetic clinic in Vellore using symptom screening (cough > 2 weeks, fever, night sweats, loss of appetite and weight loss) and clinical exam. TB suspects were confirmed with CXR and sputum examination.               |
| <b>Day et al.<sup>75</sup></b>     | South Africa | 1999-2001 | At-risk (PLHIV)          | 899    | 44  | Screening was performed on employees of a gold mine attending a free HIV clinic for the first time. Trained nurses screened for symptoms (cough and sputum production, weight loss) and a doctor examined the patient and read CXR. Sputum was obtained for microscopy and culture. |
| <b>Delva et al.<sup>76</sup></b>   | Haiti        | 2013-2014 | General                  | 94,867 | 374 | Assessed the yield of a screening in four underserved areas of Port-Au-Prince, using symptom screening (cough, hemoptysis, fever, weight loss, and night sweats) followed up by sputum smear microscopy.                                                                            |
| <b>Dememew et al.<sup>77</sup></b> | Ethiopia     | 2017-2018 | At-Risk (Health Workers) | 113    | 22  | Trained TB focal persons and health extension workers screened selected at-risk groups using symptom screening (cough, fever, and night sweating for more                                                                                                                           |
| <b>Dememew et al.<sup>77</sup></b> |              |           | At-Risk (Mixed)          | 653    | 38  |                                                                                                                                                                                                                                                                                     |

|                                      |              |           |                    |         |     |                                                                                                                                                                                                                                                       |
|--------------------------------------|--------------|-----------|--------------------|---------|-----|-------------------------------------------------------------------------------------------------------------------------------------------------------------------------------------------------------------------------------------------------------|
| <b>Dememew et al.</b> <sup>77</sup>  |              |           | At-Risk (Prison)   | 1,112   | 27  | than two weeks or weight loss). Presumptive TB cases were referred to health facilities for clinical evaluation, sputum evaluation, fine needle aspiration, or CXR.                                                                                   |
| <b>Demissie et al.</b> <sup>78</sup> | Ethiopia     | 2012      | General            | 12,149  | 23  | A prevalence survey to determine the proportion of smear-positive TB in in Addis Ababa, using a symptom questionnaire followed up by sputum smear microscopy if symptomatic.                                                                          |
| <b>den Boon et al.</b> <sup>79</sup> | South Africa | 2002      | General            | 1,170   | 29  | A random survey of two communities in Cape Town. Participants were transported to facility for CXR and sputum collection (smear microscopy and culture).                                                                                              |
| <b>Deribew et al.</b> <sup>80</sup>  | Ethiopia     | 2009      | General            | 30,040  | 9   | A community survey where adults reporting cough of two weeks or more were considered TB suspect and asked to provide sputum for smear microscopy.                                                                                                     |
| <b>Dey et al.</b> <sup>81</sup>      | India        | 2018      | At-Risk (Slums)    | 386,242 | 177 | Community volunteers made house visits in high burden neighborhoods of Kolkata screening for symptoms of TB (cough > 2 weeks, fever > 2 weeks, and weight loss). TB suspects were referred to health facilities for smear microscopy, CXR, and Xpert. |
| <b>Dierberg et al.</b> <sup>82</sup> | India        | 2011-2013 | At-Risk (Refugees) | 27,714  | 96  | An evaluation of screening for TB and MDR-TB in Tibetan refugees in India using WHO symptom                                                                                                                                                           |

questionnaire, followed up by CXR and sputum smear microscopy and/or GeneXpert.

**Dolla et al.** <sup>83</sup>

India

2013

At-Risk (Homeless)

301

5

An investigation of TB prevalence among the homeless in Chennai City using symptom questionnaire and CXR followed up by sputum smear microscopy if CXR was abnormal.

**Elden et al.** <sup>84</sup>

Eswatini

2009

At-Risk (PLHIV)

1,467

28

An evaluation of intensified case finding conducted by nurses and lay counsellors at all HIV service entry points clinics and a hospital in rural Swaziland using symptom screening (cough>2 weeks, night sweat>2 weeks, weight loss>4 weeks, fever>2 weeks, chest pain) followed up by sputum smear microscopy.

**Erkens et al.** <sup>85</sup>

The  
Netherlands

1998-2002

At-Risk (immigrants)

68,122

187

An entry and follow up screening of people coming to the Netherlands, primarily using CXR.

|                                       |          |           |                       |         |       |                                                                                                                                                                                                                                                                 |
|---------------------------------------|----------|-----------|-----------------------|---------|-------|-----------------------------------------------------------------------------------------------------------------------------------------------------------------------------------------------------------------------------------------------------------------|
| <b>Fatima et al. #1</b> <sup>86</sup> | Pakistan | 2011-2012 | At-Risk (Urban slums) | 165,280 | 1,707 | An investigation of a community outreach program where five randomly selected districts in urban slums in the Sindh Province were covered by mobile chest camps where symptom screening was performed and followed up sputum smear microscopy if cough>2 weeks. |
| <b>Fatima et al. #2</b> <sup>87</sup> | Pakistan | 2013-2015 | At-Risk (Contacts)    | 783,043 | 4,710 | The investigators enrolled contacts living within a 50-meter radius of an index patient and screened them using PCR analysis.                                                                                                                                   |
| <b>Fournet et al.</b> <sup>88</sup>   | Brazil   | 2002-2003 | At-risk (Prison)      | 1,633   | 75    | A prevalence survey in two Brazilian prisons. Inmates had CXR taken and if abnormal provided sputum for smear microscopy and culture.                                                                                                                           |
| <b>Fox et al.</b> <sup>89</sup>       | Vietnam  | 2010-2015 | At-Risk (Contacts)    | 10,069  | 180   | In Vietnam a cluster randomized trial sought out contacts of index patients and screened them using a symptom screening and subsequent sputum smear microscopy.                                                                                                 |

|                                              |              |           |                                       |         |       |                                                                                                                                                                                                                                      |
|----------------------------------------------|--------------|-----------|---------------------------------------|---------|-------|--------------------------------------------------------------------------------------------------------------------------------------------------------------------------------------------------------------------------------------|
| <b>Gashu et al.</b> <sup>90</sup>            | Ethiopia     | 2014      | At-Risk (Contacts)                    | 272,441 | 2,091 | Trained lay people sought out and screened any contacts of people registered for anti-TB treatment for active or latent TB using symptom screening (cough, fever, night sweat, weight loss), followed up by sputum smear microscopy. |
| <b>Goetsch et al.</b> <sup>91</sup>          | Germany      | 2002-2007 | At-Risk (Drug users and the homeless) | 3,477   | 39    | Evaluation of voluntary X-ray investigation in ACF of TB in illicit drug users and the homeless in Frankfurt.                                                                                                                        |
| <b>Gopi et al. (Survey I)</b> <sup>92</sup>  | India        | 1999-2001 | General                               | 76,001  | 482   | An evaluation of two surveys employing screening by symptom questionnaire and CXR in a rural part of South India.                                                                                                                    |
| <b>Gopi et al. (Survey II)</b> <sup>92</sup> |              | 2001-2003 | General                               | 78,268  | 367   |                                                                                                                                                                                                                                      |
| <b>Gounder et al.</b> <sup>93</sup>          | South Africa | 2008-2009 | At-Risk (Pregnant)                    | 3,963   | 15    | Pregnant women presenting for routine care were screened for TB symptoms (cough > 2 weeks, sputum production, fever, night sweats, or weight loss). TB suspects were asked for sputum samples for smear microscopy and culture.      |

|                                     |          |           |                      |        |     |                                                                                                                                                                                                                                                            |
|-------------------------------------|----------|-----------|----------------------|--------|-----|------------------------------------------------------------------------------------------------------------------------------------------------------------------------------------------------------------------------------------------------------------|
| <b>Griffiths et al.<sup>1</sup></b> | The UK   | 2002-2004 | General              | 13,478 | 37  | New patients in primary care practices in London were verbally screened (BCG status, symptoms, migration history, and contact with TB cases) to assess risk of TB. If deemed appropriate, patients had tuberculin skin testing, CXR, and further referral. |
| <b>Gupta et al.<sup>94</sup></b>    | Tanzania | 2011      | At-Risk (Drug users) | 150    | 6   | An examination of yield of ACF among intravenous drug users newly started on methadone using a symptom-based questionnaire (cough, fever, weight loss, change in appetite), followed-up by sputum smear microscopy if cough persisted.                     |
| <b>Habeenzu et al.<sup>95</sup></b> | Zambia   | 2000-2001 | At-Risk (Prison)     | 1,080  | 245 | A case-finding study for pulmonary TB in 13 Zambian prisons using a structured questionnaire (including cough and previous history of TB), fluorescence sputum microscopy and culture.                                                                     |

|                                    |          |           |                     |        |     |                                                                                                                                                                                                                                                                                                                   |
|------------------------------------|----------|-----------|---------------------|--------|-----|-------------------------------------------------------------------------------------------------------------------------------------------------------------------------------------------------------------------------------------------------------------------------------------------------------------------|
| <b>Habib et al.<sup>96</sup></b>   | Pakistan | 2016-2018 | At-Risk (Diabetics) | 3,824  | 375 | Individuals attending community camps and “healthy life” centers were verbally screened for diabetes mellitus (DM). Those with a history of DM or elevated blood glucose were screened for TB using CXR and Xpert MTB/RIF.                                                                                        |
| <b>Hamusse et al.<sup>97</sup></b> | Ethiopia | 2013      | General             | 33,073 | 43  | A community survey conducted by health workers screening for symptoms (cough more than two weeks, fever, loss of appetite, weight loss, hemoptysis, chest pain, difficulty breathing). Individuals with symptoms submitted sputum for smear microscopy and culture.                                               |
| <b>Harling et al.<sup>98</sup></b> | The UK   | 2002      | At-Risk (Refugees)  | 8,258  | 11  | Screening among asylum seekers arriving in the UK using TST.                                                                                                                                                                                                                                                      |
| <b>Hoa et al.<sup>99</sup></b>     | Vietnam  | 2006-2007 | General             | 94,179 | 269 | A nationally representative prevalence survey was conducted, identifying TB suspected using interview and mobile CXR. Individuals were considered TB suspect if they had productive cough for more than two weeks, current TB treatment, CXR abnormalities consistent with TB, or history of TB with the previous |

two years. TB suspects provided sputum for smear microscopy and culture.

|                                        |          |           |                             |        |    |                                                                                                                                                                                                                                                             |
|----------------------------------------|----------|-----------|-----------------------------|--------|----|-------------------------------------------------------------------------------------------------------------------------------------------------------------------------------------------------------------------------------------------------------------|
| <b>Horie et al.</b> <sup>100</sup>     | Vietnam  | 2002-2003 | General                     | 11,654 | 22 | A prevalence survey in Hanoi. All participants had CXR taken and answered symptom questionnaires (cough for at least three weeks, sputum production and fever). Individuals with symptoms or abnormal CXR provided sputum for smear microscopy and culture. |
| <b>Huang et al.</b> <sup>101</sup>     | Taiwan   | 2002      | At-risk (Institutionalized) | 4,200  | 38 | A CXR screening of patients admitted to a mental hospital. Patients with abnormal CXR provided sputum for smear microscopy and culture.                                                                                                                     |
| <b>Imsanguan et al.</b> <sup>102</sup> | Thailand | 2017-2018 | At-Risk (Contacts)          | 184    | 11 | An evaluation contact investigation in Chiang Rai Province, Thailand using symptom screening followed up by CXR.                                                                                                                                            |

|                                             |            |           |                       |         |     |                                                                                                                                                                                                                                                                                  |
|---------------------------------------------|------------|-----------|-----------------------|---------|-----|----------------------------------------------------------------------------------------------------------------------------------------------------------------------------------------------------------------------------------------------------------------------------------|
| <b>Jackson-Sillah et al.</b> <sup>103</sup> | The Gambia | 2002-2004 | At-Risk (HHC)         | 2,174   | 33  | A household contact screening among a group of cases from the greater Banjul area using symptom screening (fever, cough, dyspnea, hemoptysis, night sweat, weight loss, and anorexia) and TST followed up by CXR.                                                                |
| <b>James et al.</b> <sup>104</sup>          | Cambodia   | 2012-2013 | General               | 68,486  | 397 | A comparison of cost-effectiveness of different models of TB screening. One focusing on household contacts of index patients and one arm focusing on door-to-door screening in an urban environment using symptom screening followed up by sputum smear microscopy or GeneXpert. |
| <b>James et al.</b> <sup>104</sup>          |            |           | At-Risk (Urban slums) | 315,874 | 737 |                                                                                                                                                                                                                                                                                  |
| <b>James et al.</b> <sup>104</sup>          |            |           | At-Risk (HHC)         | 33,029  | 807 |                                                                                                                                                                                                                                                                                  |
| <b>Jerene et al.</b> <sup>105</sup>         | Ethiopia   | 2013-2014 | At-Risk (HHC)         | 15,527  | 389 | In Oromia and Amhara regions of Ethiopia, investigators screened household contacts for TB using symptom screening (cough>2 weeks) followed up by sputum smear microscopy.                                                                                                       |

|                                              |         |           |                                |        |       |                                                                                                                                                                                                                                                                                                                                                 |
|----------------------------------------------|---------|-----------|--------------------------------|--------|-------|-------------------------------------------------------------------------------------------------------------------------------------------------------------------------------------------------------------------------------------------------------------------------------------------------------------------------------------------------|
| <b>Jiménez-Fuentes et al.</b> <sup>106</sup> | Spain   | 2009-2012 | At-Risk (Mixed at-risk groups) | 5,982  | 30    | A retrospective screening of at-risk groups, including drug users, the economically disadvantaged, and recent immigrants using symptom screening and CXR.                                                                                                                                                                                       |
| <b>John et al.</b> <sup>107</sup>            | Nigeria | 2012-2013 | At-risk (Marginalized)         | 96,736 | 1,310 | Screening of nomadic communities using symptom screening (cough for at least two weeks) followed up by sputum smear microscopy.                                                                                                                                                                                                                 |
| <b>Kakinda et al.</b> <sup>108</sup>         | Uganda  | 2017      | At-Risk (HHC)                  | 2,707  | 38    | Patients with TB were visited by two health workers, a nurse, and a community health worker, who screened household contacts based on symptoms (evening persistent fevers > 2 weeks, night sweats > 3 weeks, and weight loss). Coughing TB suspects provided sputum sample for Xpert. Other TB suspects were referred for clinical examination. |

|                                                    |              |           |                                |         |       |                                                                                                                                                                                                                                                                                                                                                                                  |
|----------------------------------------------------|--------------|-----------|--------------------------------|---------|-------|----------------------------------------------------------------------------------------------------------------------------------------------------------------------------------------------------------------------------------------------------------------------------------------------------------------------------------------------------------------------------------|
| <b>Kali et al.</b> <sup>109</sup>                  | South Africa | 2003      | At-risk (PLHIV/Pregnant)       | 370     | 8     | HIV-infected pregnant women were screened at clinics for the prevention of mother-to-child transmission of HIV for TB symptoms (cough more than two weeks, hemoptysis, night sweats, weight loss, chest pain, shortness of breath, sputum production, loss of appetite, tiredness). If symptomatic they were examined by a nurse and provided sputum for microscopy and culture. |
| <b>Kamenska et al. (Strategy 1)</b> <sup>110</sup> | Ukraine      | 2014      | At-Risk (Mixed at-risk groups) | 43,087  | 513   | An evaluation of different strategies for ACF of TB in intravenous drug users, sex workers, men who have sex with men, ex-prisoners, Roma, and homeless using decentralized symptom screening and specimen collection (strategy 1), decentralized symptom screening with patient referred for specimen collection (strategy 2), and strategy 2 plus GeneXpert (strategy 3).      |
| <b>Kamenska et al. (Strategy 2)</b> <sup>110</sup> |              | 2015-2017 | At-Risk (Mixed at-risk groups) | 488,432 | 1,473 |                                                                                                                                                                                                                                                                                                                                                                                  |
| <b>Kamenska et al. (Strategy 3)</b> <sup>110</sup> |              | 2018      | At-Risk (Mixed at-risk groups) | 149,241 | 351   |                                                                                                                                                                                                                                                                                                                                                                                  |

|                                       |                  |           |                     |        |     |                                                                                                                                                                                                                                        |
|---------------------------------------|------------------|-----------|---------------------|--------|-----|----------------------------------------------------------------------------------------------------------------------------------------------------------------------------------------------------------------------------------------|
| <b>Karamagi et al.</b> <sup>111</sup> |                  |           | At-Risk (Fishermen) | 2,125  | 27  |                                                                                                                                                                                                                                        |
| <b>Karamagi et al.</b> <sup>111</sup> | Uganda           | 2016-2017 | At-Risk (HHC)       | 2,205  | 40  | An evaluation of an ACF intervention among key vulnerable populations in 48 facilities in Uganda using symptom screening and sputum smear microscopy/GeneXpert.                                                                        |
| <b>Karamagi et al.</b> <sup>111</sup> |                  |           | At-Risk (PLHIV)     | 911    | 12  |                                                                                                                                                                                                                                        |
| <b>Karamagi et al.</b> <sup>111</sup> |                  |           | At-Risk (Prison)    | 7,028  | 34  |                                                                                                                                                                                                                                        |
| <b>Karki et al.</b> <sup>112</sup>    | Papua New Guinea | 2015-2016 | General             | 10,700 | 113 | Evaluation of active community case finding in Morobe Province. Over 3 months 26 villages were screened using symptom screening (cough, fever, weight loss, hemoptysis, fatigue, night sweats) followed up by sputum smear microscopy. |
| <b>Kebede et al.</b> <sup>113</sup>   | Ethiopia         | 2010-2011 | General             | 46,697 | 110 | A national prevalence survey using symptom screening (cough for at least two weeks) and CXR. Those with symptoms or abnormal CXR provided sputum for microscopy and culture.                                                           |

|                                       |              |           |                    |       |    |                                                                                                                                                                                                                                                                           |
|---------------------------------------|--------------|-----------|--------------------|-------|----|---------------------------------------------------------------------------------------------------------------------------------------------------------------------------------------------------------------------------------------------------------------------------|
| <b>Kempker et al.</b> <sup>114</sup>  | Georgia      | 2014-2015 | At-Risk (PLHIV)    | 131   | 15 | A study of ACF of active pulmonary tuberculosis among PLHIV in Tbilisi using sputum smear microscopy and Xpert TB/RIF assay.                                                                                                                                              |
| <b>Khaparde et al.</b> <sup>115</sup> | India        | 2010-2011 | At-Risk (HHC)      | 1,556 | 17 | Evaluation of HHC investigation for active TB case finding in Chattisgarh using symptom screening followed up by CXR and sputum smear microscopy.                                                                                                                         |
| <b>Khatana et al.</b> <sup>116</sup>  | India        | 2014-2015 | At-Risk (Contacts) | 598   | 27 | A quasi-randomized interventional study in two TB units in Kashmir to evaluate contact tracing using symptom screening followed up by sputum smear microscopy.                                                                                                            |
| <b>Kigozi et al.</b> <sup>117</sup>   | South Africa | 2016      | At-Risk (HHC)      | 259   | 17 | An evaluation of HHC investigation among patients with TB of 40 primary health care centers in Manguang Metropolitan District using symptom screening (cough, weight loss, fever, and night sweats) followed up by clinical evaluation including sputum smear microscopy. |

|                                          |              |           |                    |       |     |                                                                                                                                                                                                         |
|------------------------------------------|--------------|-----------|--------------------|-------|-----|---------------------------------------------------------------------------------------------------------------------------------------------------------------------------------------------------------|
| <b>Kilicaslan et al.</b> <sup>118</sup>  | Turkey       | 1997-2000 | At-risk (Contacts) | 3,310 | 222 | A contact investigation at 24 TB dispensaries using symptom screening, CXR, and bacteriological testing.                                                                                                |
| <b>Kimerling et al.</b> <sup>119</sup>   | Cambodia     | 2000      | At-Risk (PLHIV)    | 441   | 54  | An investigation of the burden of active pulmonary TB among PLHIV in a home care program in Phnom Penh using symptom screening and sputum smear microscopy.                                             |
| <b>Kirkpatrick et al.</b> <sup>120</sup> | The UK       | 2005      | At-risk (Contacts) | 137   | 1   | A contact investigation of a cluster a job centre using Mantoux test, followed by gamma interferon test if positive, followed by CXR if positive, and confirmed by clinical assessment if abnormal CXR. |
| <b>Kranzer et al.</b> <sup>121</sup>     | South Africa | 2009-2011 | At-Risk (PLHIV)    | 520   | 30  | Through a mobile HIV service, operating out of Cape Town, investigators implemented a TB screening strategy using symptom screening and sputum smear microscopy.                                        |
| <b>Lawn et al.</b> <sup>122</sup>        | South Africa | 2012-2013 | At-Risk (PLHIV)    | 427   | 139 | A systematic rapid screening for TB among PLHIV on the first day of acute hospital admission using comprehensive clinical sampling (sputum, urine, blood,                                               |

pus and other relevant samples) evaluated by GeneXpert and Mycobacterial culture.

**Lebina et al.** <sup>123</sup>

South Africa

2011-2012

At-Risk (Contacts)

2,464

55

A small contact tracing screening. Every contact was evaluated using sputum smear and PCR.

**Lee et al.** <sup>124</sup>

Philippines

2014

At-Risk (Extreme poverty)

4,635

53

An evaluation of ACF implemented by International Care Ministries in people living in extreme poverty using symptom screening (cough, fever, fatigue, weight loss) followed up by sputum smear microscopy and CXR.

**Legesse et al.** <sup>125</sup>

Ethiopia

2010

General

18,192

62

A house-to-house community prevalence survey using symptom screening (cough for at least two weeks, expectoration, hemoptysis, chest pain, night sweat, breathlessness, loss of appetite/weight, fever). TB suspects provided sputum for smear microscopy and culture.

**Leung et al.** <sup>126</sup>

Hong Kong

2001

At-Risk (Prison)

814

10

An evaluation of CXR screening for TB among male prisoners in a prison in Hong Kong.

|                                     |              |           |                       |         |     |                                                                                                                                                                                                                                                                                            |
|-------------------------------------|--------------|-----------|-----------------------|---------|-----|--------------------------------------------------------------------------------------------------------------------------------------------------------------------------------------------------------------------------------------------------------------------------------------------|
| <b>Lewis et al.</b> <sup>127</sup>  | South Africa | 2000-2001 | At-risk (Miners)      | 1,955   | 51  | Gold miners attending annual medical examination were screened for TB using CXR, symptom questionnaire (cough, sputum production, hemoptysis, night sweats, fever, weight loss), and sputum collection for microscopy and culture. If positive they were referred for further examination. |
| <b>Little et al.</b> <sup>128</sup> | South Africa | 2013-2014 | At-Risk (HHC)         | 282     | 14  | An evaluation of the yield of HHC tracing among newly diagnosed patients with TB in Vhembe District using sputum smear microscopy and culture.                                                                                                                                             |
| <b>Lorent et al.</b> <sup>129</sup> | Cambodia     | 2012-2013 | At-Risk (Urban poor)  | 315,874 | 783 | A large door-to-door survey conducted in poor urban settlements in Phnom Penn using symptom screening and sputum smear microscopy.                                                                                                                                                         |
| <b>Mabuto et al.</b> <sup>130</sup> | South Africa | 2011-2012 | At-Risk (Bus drivers) | 686     | 10  | A screening among minibus drivers in Cape Town using symptom screening (cough, fever, night sweats, and weight loss) and fluorescence sputum microscopy and culture.                                                                                                                       |

|                                       |         |           |                      |         |     |                                                                                                                                                                                                                                                           |
|---------------------------------------|---------|-----------|----------------------|---------|-----|-----------------------------------------------------------------------------------------------------------------------------------------------------------------------------------------------------------------------------------------------------------|
| <b>Manzardo et al.</b> <sup>131</sup> | Spain   | 2001-2004 | At-risk (Immigrants) | 2,464   | 8   | A screening for tropical diseases in immigrants having arrived in the previous five years. TB screening was performed using TST and CXR.                                                                                                                  |
| <b>Marks et al.</b> <sup>28</sup>     | Vietnam | 2014-2018 | General              | 173,968 | 436 | A controlled trial to evaluate the effect of community-wide screening for TB. In the intervention group residents were screened for symptoms (cough, sputum production, hemoptysis) and asked for a sputum sample for for Xpert, microscopy, and culture. |
| <b>Masur et al.</b> <sup>132</sup>    | Haiti   | 2013      | At-Risk (Urban slum) | 7,500   | 100 | A large-scale screening for TB in a slum in Port-au-Prince combined with HHC tracing three years after the 2010 earthquake. Community health workers screened for cough of more than two weeks and referred for evaluation.                               |
| <b>Masur et al.</b> <sup>132</sup>    |         |           | At-Risk (HHC)        | 317     | 44  |                                                                                                                                                                                                                                                           |

|                                         |              |           |                  |        |     |                                                                                                                                                                                                                                                |
|-----------------------------------------|--------------|-----------|------------------|--------|-----|------------------------------------------------------------------------------------------------------------------------------------------------------------------------------------------------------------------------------------------------|
| <b>Matee et al.</b> <sup>133</sup>      | Tanzania     | 2001-2006 | At-risk (PLHIV)  | 2,216  | 103 | PLHIV screened in preparation for the DARDAR vaccination study. All subjects had baseline CXR and sputum collected for microscopy and culture.                                                                                                 |
| <b>Merid et al. #1</b> <sup>134</sup>   | Ethiopia     | 2016      | General          | 24,517 | 34  | An evaluation of the utility of a volunteer health development army in conducting population screening for active TB in rural Ethiopia using symptom screening (cough>2 weeks) followed up by sputum smear microscopy, GeneXpert, and culture. |
| <b>Merid et al. #2</b> <sup>135</sup>   | Ethiopia     | 2015      | At-Risk (Prison) | 2,068  | 31  | An investigation of the burden of pulmonary TB using ACF among prisoners using symptom screening (cough>2 weeks) followed up by sputum smear microscopy, GeneXpert, and culture.                                                               |
| <b>Middelkoop et al.</b> <sup>136</sup> | South Africa | 2008      | General          | 1,250  | 20  | A community prevalence survey using symptom questionnaire and sputum for microscopy and culture.                                                                                                                                               |

|                                      |        |           |                      |        |    |                                                                                                                                                                                                                                                                                                                                                   |
|--------------------------------------|--------|-----------|----------------------|--------|----|---------------------------------------------------------------------------------------------------------------------------------------------------------------------------------------------------------------------------------------------------------------------------------------------------------------------------------------------------|
| <b>Migambi et al.</b> <sup>137</sup> | Rwanda | 2012      | General              | 43,128 | 40 | A national survey designed using a cluster random sampling approach. All residents in selected villages were administered a short, structured symptoms interview followed by CXR. If presence of cough of any duration and/or CXR abnormalities or refusal to be screened by CXR, sputum samples were collected for microscopy and solid culture. |
| <b>Miller et al.</b> <sup>138</sup>  | Brazil | 2005-2006 | At-Risk (HHC)        | 23,865 | 92 | A pair-matched cluster-randomized trial comparing symptom screening among HHCs and spot sputum collection in a large, impoverished squatters' settlement in Rio de Janeiro.                                                                                                                                                                       |
| <b>Mor et al. #1</b> <sup>139</sup>  | Israel | 2009      | At-Risk (Immigrants) | 1,087  | 11 | Screening of undocumented immigrants from the Horn of Africa and into Israel by CXR.                                                                                                                                                                                                                                                              |



|                                                |              |           |                    |     |    |                                                                                                                                                                                                                                                                                            |
|------------------------------------------------|--------------|-----------|--------------------|-----|----|--------------------------------------------------------------------------------------------------------------------------------------------------------------------------------------------------------------------------------------------------------------------------------------------|
| <b>Mwansa-Kambafwile et al.</b> <sup>143</sup> | South Africa | 2011-2012 | At-Risk (Contacts) | 718 | 22 | A contact screening. Patients with TB were offered paper slips to provide contact information to close contacts who were subsequently invited to be screened based on symptoms followed up by sputum smear microscopy and GeneXpert.                                                       |
| <b>Nachea et al.</b> <sup>144</sup>            | South Africa | 2001      | At-risk (PLHIV)    | 318 | 13 | A screening study on HIV-infected mothers at a perinatal HIV research unit. Screening was performed during post-natal follow-up using TST. Those with positive reaction were screened for symptoms and using CXR. If positive, subjects provided sputum for smear microscopy and culture.  |
| <b>Nair et al.</b> <sup>145</sup>              | India        | 2007-2014 | At-Risk (HHC)      | 544 | 29 | Retrospective record review of HHCs of newly diagnosed patients with sputum smear positive TB enrolled in a clinical trial at National Institute of Research in Tuberculosis, Chennai. Screening was performed using symptom questionnaire and CXR followed up by sputum smear microscopy. |

|                                       |          |           |                    |        |     |                                                                                                                                                                                                                  |
|---------------------------------------|----------|-----------|--------------------|--------|-----|------------------------------------------------------------------------------------------------------------------------------------------------------------------------------------------------------------------|
| <b>Ngadaya et al.</b> <sup>146</sup>  | Tanzania | 2007      | General            | 65,530 | 271 | A study comparing prevalence of active TB by duration of cough. Outpatients at six health facilities were screened for cough. Those reporting cough regardless of duration provided sputum for smear microscopy. |
| <b>Noeske et al.</b> <sup>147</sup>   | Cameroon | 2003-2004 | At-risk (Prison)   | 2,474  | 87  | A prevalence survey of active TB at a prison using screening for cough of at least two weeks followed up by sputum smear microscopy if positive.                                                                 |
| <b>Nogueira et al.</b> <sup>148</sup> | Brazil   | 2008      | At-risk (Prison)   | 2,237  | 26  | A prevalence survey of active TB at a prison using TST followed up by sputum smear microscopy and culture if positive.                                                                                           |
| <b>Ogbudebe et al.</b> <sup>149</sup> | Nigeria  | 2012      | General            | 15,159 | 923 | An assessment of the yield and profile of TB in three urban slums in southeastern Nigeria through ACF using symptom screening (cough, fever, weight loss, night                                                  |
| <b>Ogbudebe et al.</b> <sup>149</sup> |          |           | At-Risk (Contacts) | 192    | 10  |                                                                                                                                                                                                                  |

|                                         |              |           |                    |         |       |                                                                                                                                                                                                                                                                  |
|-----------------------------------------|--------------|-----------|--------------------|---------|-------|------------------------------------------------------------------------------------------------------------------------------------------------------------------------------------------------------------------------------------------------------------------|
| <b>Ogbudebe et al.</b> <sup>149</sup>   |              |           | At-Risk (PLHIV)    | 1,392   | 146   | sweats, and lymph node swelling) followed up by evaluation and sputum smear microscopy.                                                                                                                                                                          |
|                                         |              |           |                    |         |       |                                                                                                                                                                                                                                                                  |
| <b>Ohene et al.</b> <sup>150</sup>      | Ghana        | 2010-2014 | At-Risk (Contacts) | 8,166   | 53    | A retrospective analysis of a contact investigation intervention at 10 facilities in Accra using a symptom-based questionnaire (cough, fever, night sweats, and weight loss) followed up by sputum smear microscopy.                                             |
|                                         |              |           |                    |         |       |                                                                                                                                                                                                                                                                  |
| <b>Oshi et al.</b> <sup>151</sup>       | Nigeria      | 2012-2014 | General            | 218,751 | 1,447 | A retrospective evaluation of an active case-finding intervention utilizing community-based approaches and targeted systematic TB screening in Ebonyi State. Screening was performed using a symptom-based questionnaire followed up by sputum smear microscopy. |
|                                         |              |           |                    |         |       |                                                                                                                                                                                                                                                                  |
| <b>Page-Shipp et al.</b> <sup>152</sup> | South Africa | 2012      | General            | 714     | 2     | At the 2012 World TB day in South Africa, symptomatic individuals from goldmining and nearby communities were offered screening by PCR.                                                                                                                          |
|                                         |              |           | At-Risk (Miners)   | 947     | 10    |                                                                                                                                                                                                                                                                  |

|                                         |           |           |                      |        |     |                                                                                                                                                                                                                      |
|-----------------------------------------|-----------|-----------|----------------------|--------|-----|----------------------------------------------------------------------------------------------------------------------------------------------------------------------------------------------------------------------|
| <b>Pelissari et al.</b> <sup>153</sup>  | Brazil    | 2014-2016 | At-Risk (Prison)     | 10,326 | 196 | An assessment of TB prevalence by ACF in a public prison in southern Brazil using symptom screening and CXR followed up by sputum smear microscopy or Xpert.                                                         |
| <b>Plant et al.</b> <sup>154</sup>      | Australia | 1997-2001 | At-risk (Immigrants) | 6,018  | 36  | Results of screening applicants for migration from Vietnam and Cambodia using CXR and clinical evaluation. If suggestive of TB, applicants provided sputum for smear microscopy and culture.                         |
| <b>Pontarelli et al.</b> <sup>155</sup> | Italy     | 2015-2016 | At-Risk (Refugees)   | 2,567  | 14  | A retrospective cohort study of screening for active TB in asylum seekers in Italy using symptom screening (fever, cough, night sweats, weight loss, and hemoptysis) followed up by CXR and sputum smear microscopy. |
| <b>Qian et al.</b> <sup>156</sup>       | China     | 2007      | At-risk (PLHIV)      | 195    | 9   | A cross-sectional prevalence survey among PLHIV in one county in Shanxi province. Patients were screened using TST, CXR, and sputum smear microscopy in those reporting symptoms.                                    |

|                                          |          |           |                        |        |     |                                                                                                                                                                                                                                                                 |
|------------------------------------------|----------|-----------|------------------------|--------|-----|-----------------------------------------------------------------------------------------------------------------------------------------------------------------------------------------------------------------------------------------------------------------|
| <b>Rao et al. #1</b> <sup>157</sup>      | Pakistan | 2002      | At-risk (Prison)       | 4,870  | 32  | A prevalence survey at a Karachi prison using symptom screening (cough, chest pain, hemoptysis, weight loss, fever) followed up by CXR sputum smear microscopy if positive.                                                                                     |
| <b>Rao et al. #2</b> <sup>158, 159</sup> | India    | 2009-2010 | General                | 95,071 | 221 | A prevalence survey of urban and rural populations of Jabalpur district using symptom screening (cough at least two weeks, chest pain, fever, hemoptysis). Those with symptoms of history of previous TB had sputum collected for smear microscopy and culture. |
| <b>Rao et al. #3</b> <sup>159</sup>      | India    | 2007-2008 | At-risk (Marginalized) | 11,116 | 169 | Prevalence survey among a tribal population using symptom screening (cough at least two weeks, chest pain, fever, hemoptysis) followed up by sputum smear microscopy and culture if positive.                                                                   |
| <b>Reddy et al.</b> <sup>160</sup>       | Peru     | 2007      | At-risk (PLHIV)        | 471    | 27  | A screening of PLHIV prior to isoniazid preventive therapy using Mycobacterial culture.                                                                                                                                                                         |

|                                              |         |           |                        |         |       |                                                                                                                                                                                                      |
|----------------------------------------------|---------|-----------|------------------------|---------|-------|------------------------------------------------------------------------------------------------------------------------------------------------------------------------------------------------------|
| <b>Rekha Devi et al.</b> <sup>161</sup>      | India   | 2008-2010 | General                | 4,371   | 24    | A cross-sectional study of the prevalence of TB and paragonimiasis in remote areas of North-Eastern India using screening for cough followed up by sputum smear microscopy.                          |
| <b>Rivera et al.</b> <sup>162</sup>          | Haiti   | 2014-2015 | At-Risk (Slums)        | 104,097 | 1,110 | An investigation of prevalence of undiagnosed TB through GHESKIO's ACF campaign in Haitian slums, screening for chronic cough followed up by physical examination, CXR, and sputum smear microscopy. |
| <b>Romero-Sandoval et al.</b> <sup>163</sup> | Ecuador | 2001      | At-risk (Marginalized) | 653     | 44    | A house-to-house prevalence survey in an indigenous community using a symptom questionnaire (primarily cough) followed up by sputum smear microscopy.                                                |

|                              |             |           |                                |           |       |                                                                                                                                                                                                                                           |
|------------------------------|-------------|-----------|--------------------------------|-----------|-------|-------------------------------------------------------------------------------------------------------------------------------------------------------------------------------------------------------------------------------------------|
| Rumman et al. <sup>2</sup>   | Jordan      | 2005      | General                        | 61,730    | 2     | A prevalence survey of urban and rural communities in Balqa province using symptom questionnaire (cough more than three weeks). Suspects were referred to the nearest health center for clinical examination and sputum smear microscopy. |
| Sanaie et al. <sup>164</sup> |             |           | General                        | 1,699,277 | 8,124 |                                                                                                                                                                                                                                           |
| Sanaie et al. <sup>164</sup> | Afghanistan | 2011-2012 | At-Risk (HHC)                  | 16,645    | 304   | A complex study evaluating three types of active case finding: systematically screening for cough followed up by smear microscopy at 1) at health clinics 2) household contacts 3) camps for internally displaced people.                 |
| Sanaie et al. <sup>164</sup> |             |           | At-Risk (Internally Displaced) | 306,205   | 735   |                                                                                                                                                                                                                                           |

|                                        |        |           |                  |        |     |                                                                                                                                                                                                                                                                                                |
|----------------------------------------|--------|-----------|------------------|--------|-----|------------------------------------------------------------------------------------------------------------------------------------------------------------------------------------------------------------------------------------------------------------------------------------------------|
|                                        |        |           |                  |        |     |                                                                                                                                                                                                                                                                                                |
| <b>Sanchez et al. #1<sup>165</sup></b> | Brazil | 2005      | At-risk (Prison) | 1,696  | 46  | Screening for active TB upon admission to three prisons in Rio de Janeiro using CXR followed by sputum smear microscopy and culture if abnormal.                                                                                                                                               |
| <b>Sanchez et al. #2<sup>166</sup></b> | Brazil | 2002      | At-risk (Prison) | 1,052  | 48  | A cross-sectional prevalence survey in a prison in Rio de Janeiro using a modified WHO score symptom screening (cough at least three weeks, sputum production, weight loss, loss of appetite, chest pain), CXR, and TST. If suspect, inmates provided sputum for smear microscopy and culture. |
| <b>Santha et al.<sup>167</sup></b>     | India  | 2001-2002 | General          | 55,561 | 267 | A study comparing yields of smear-positive TB patients when screening new out-patients at health facilities using either coughing for at least two weeks or three weeks as screening tool.                                                                                                     |

|                                       |          |           |                                   |       |     |                                                                                                                                                                                                                                                                                  |
|---------------------------------------|----------|-----------|-----------------------------------|-------|-----|----------------------------------------------------------------------------------------------------------------------------------------------------------------------------------------------------------------------------------------------------------------------------------|
| <b>Santos et al.</b> <sup>168</sup>   | Brazil   | 2017-2018 | At-Risk (Prison)                  | 5,387 | 214 | A study of yield, efficiency, and costs of mass screening for TB in Brazilian prisons using a symptom assessment, CXR, and sputum Xpert and culture.                                                                                                                             |
| <b>Saunders et al.</b> <sup>169</sup> | Peru     | 2002-2016 | At-Risk (Shantytowns)             | 2,666 | 232 | A prospective cohort study of active and passive case finding in shantytowns in Peru using sputum smear microscopy and clinical assessment irrespective of symptoms.                                                                                                             |
| <b>Schepisi et al.</b> <sup>170</sup> | Italy    | 2009-2010 | At-Risk (Immigrants and refugees) | 6,347 | 11  | An analysis of three types of TB screening among immigrants and asylum seekers at primary care facilities and mobile clinics using symptom-based screening (fever, cough, night sweats, weight loss, hemoptysis, and chest pain) followed up by sputum smear microscopy and CXR. |
| <b>Sculier et al.</b> <sup>171</sup>  | Cambodia | 2007-2008 | At-risk (PLHIV)                   | 212   | 37  | A study to evaluate abdominal ultrasound for diagnosis of TB in PLHIV. All participants were screened using smear microscopy and culture.                                                                                                                                        |

|                                         |          |           |                             |        |     |                                                                                                                                                                                                                                                           |
|-----------------------------------------|----------|-----------|-----------------------------|--------|-----|-----------------------------------------------------------------------------------------------------------------------------------------------------------------------------------------------------------------------------------------------------------|
| <b>Sekandi et al. #1</b> <sup>172</sup> | Uganda   | 2008-2009 | General                     | 5,102  | 39  | A dual-infection screening. A door-to-door survey of a small community in Uganda. Patients were screened for chronic cough and followed up with sputum smear microscopy or culture if coughing.                                                           |
| <b>Sekandi et al. #2</b> <sup>173</sup> | Uganda   | 2005      | At-Risk (Slums)             | 930    | 33  | A door-to-door survey in five random slum areas of Kampala. Adults were interviewed to identify chronic coughers, and subsequent sputum smear.                                                                                                            |
| <b>Sengai et al.</b> <sup>174</sup>     | Zimbabwe | 2017      | At-Risk (High burden areas) | 39,065 | 663 | An evaluation of targeted screening for active TB using mobile trucks in 15 high burden districts of Zimbabwe. Screening was performed using symptom assessment (cough, fever, and night sweats) and CXR followed up by sputum smear microscopy or Xpert. |
| <b>Shah et al. #1</b> <sup>175</sup>    | Pakistan | 2010-2011 | At-Risk (HHC)               | 19,191 | 490 | Trained lay workers provided house visits to confirmed TB cases and screened for symptoms of TB (fever, cough, dyspnea, hemoptysis, and weight loss). Suspects were provided free transport to a sputum smear.                                            |

|                                      |              |           |                 |        |     |                                                                                                                                                                                                                          |
|--------------------------------------|--------------|-----------|-----------------|--------|-----|--------------------------------------------------------------------------------------------------------------------------------------------------------------------------------------------------------------------------|
| <b>Shah et al. #2</b> <sup>176</sup> | Vietnam      | 2001-2004 | At-risk (PLHIV) | 597    | 29  | A study evaluating CXR as a screening method in PLHIV. Further examination was done if CXR was abnormal and diagnosis was based on microbiological, radiographic, and clinical evidence.                                 |
| <b>Shapiro et al.</b> <sup>177</sup> | South Africa | 2009      | General         | 983    | 4   | Field teams screened for active TB in households with a newly diagnosed TB case using a symptom questionnaire and sputum smear microscopy. If symptomatic and smear negative, suspects were referred to CXR.             |
| <b>Shapiro et al.</b> <sup>177</sup> |              |           | At-Risk (HHC)   | 2,843  | 169 |                                                                                                                                                                                                                          |
| <b>Shargie et al.</b> <sup>178</sup> | Ethiopia     | 2003      | General         | 16,697 | 13  | A prevalence survey of smear-positive TB in a rural population using screening for symptoms (cough of more than two weeks, chest pain, difficulty breathing). If symptomatic, sputum was collected for smear microscopy. |
| <b>Shenoi et al.</b> <sup>179</sup>  | South Africa | 2010-2012 | General         | 5,615  | 41  | A community-based HIV/TB case finding regimen in a rural subdistrict of South Africa using symptom screening and subsequent sputum smear.                                                                                |

|                                        |           |           |                           |        |    |                                                                                                                                                                                     |
|----------------------------------------|-----------|-----------|---------------------------|--------|----|-------------------------------------------------------------------------------------------------------------------------------------------------------------------------------------|
| <b>Shriraam et al.</b> <sup>180</sup>  | India     | 2016-2017 | At-Risk (Migrant workers) | 580    | 1  | A cross-sectional study of TB prevalence among migrant brick kiln workers, screening for cough more than two weeks followed up by sputum smear microscopy and GeneXpert.            |
| <b>Soemantri et al.</b> <sup>181</sup> | Indonesia | 2004      | General                   | 50,154 | 80 | A national prevalence survey of smear-positive TB using screening for symptoms (productive cough yielding sputum or blood). If positive, sputum was collected for smear microscopy. |
| <b>Ssemmondo et al.</b> <sup>182</sup> | Uganda    | 2013-2014 | General                   | 27,214 | 10 | A symptom screening focused on chronic cough was offered alongside a mobile HIV testing facility. Sputum smear microscopy was offered to people with prolonged cough.               |
| <b>Su et al.</b> <sup>183</sup>        | Taiwan    | 2004-2005 | General                   | 17,105 | 22 | An evaluation of a pre-employment screening program using CXR in an industrial park in Taiwan.                                                                                      |
| <b>Tefera et al.</b> <sup>184</sup>    | Ethiopia  | 2015      | At-Risk (HHC)             | 1,509  | 19 | A cross-sectional study evaluating HHC screening at TB/DOTS facilities in Ethiopia using symptom screening followed up by clinical investigation at a hospital.                     |

|                                     |              |           |                          |        |     |                                                                                                                                                                                                                                                              |
|-------------------------------------|--------------|-----------|--------------------------|--------|-----|--------------------------------------------------------------------------------------------------------------------------------------------------------------------------------------------------------------------------------------------------------------|
| <b>Thind et al.<sup>185</sup></b>   | South Africa | 2009      | At-risk (Contacts)       | 3,033  | 93  | Evaluation of a contact tracing programme using symptom screening (cough at least two weeks, sputum production, fever, hemoptysis, dyspnoea, pleuritic chest pain, weight loss, night sweats). TB suspects provided sputum for smear microscopy and culture. |
| <b>Thorson et al.<sup>186</sup></b> | Vietnam      | 2000      | General                  | 35,832 | 25  | A prevalence study to determine sex differential prevalence in Ha Tay Province screening for cough of more than three weeks and confirming by sputum smear microscopy and CXR.                                                                               |
| <b>Tripodi et al.<sup>187</sup></b> | France       | 2006-2007 | At-risk (Health workers) | 148    | 0   | A cross sectional study in health workers at the University Hospital of Nantes using TST and confirming by CXR.                                                                                                                                              |
| <b>Tupasi et al.<sup>188</sup></b>  | Philippines  | 2007      | General                  | 22,867 | 151 | A nationally representative prevalence survey using symptom screening (cough at least two weeks, hemoptysis, fever, night sweats, chest pain, weigh loss) and CXR. Diagnosis was confirmed by sputum smear microscopy and culture.                           |

|                                           |         |           |                               |       |    |                                                                                                                                                                                                                                                                        |
|-------------------------------------------|---------|-----------|-------------------------------|-------|----|------------------------------------------------------------------------------------------------------------------------------------------------------------------------------------------------------------------------------------------------------------------------|
| <b>Van Duc et al.</b> <sup>189</sup>      | Vietnam | 2005      | At-risk (Marginalized)        | 300   | 1  | A prevalence survey in a psychiatric hospital using symptom screening (hemoptysis, prolonged cough, cough with sputum, weight loss, chest pain, dyspnoea) and CXR. Diagnosis was confirmed by sputum smear microscopy.                                                 |
| <b>Verver et al.</b> <sup>190</sup>       | Zambia  | 2013-2014 | At-Risk (Health care workers) | 1,082 | 18 | A study focused on the screening of health care workers. This consisted of a symptom screening and subsequent sputum smear.                                                                                                                                            |
| <b>Vieira et al.</b> <sup>191</sup>       | Brazil  | 2006      | At-risk (Prison)              | 397   | 7  | A prevalence survey of a prison in the state of Sao Paulo screening for cough of more than three weeks and confirming by sputum smear microscopy and culture                                                                                                           |
| <b>Vijayageetha et al.</b> <sup>192</sup> | India   | 2018      | At-Risk (Pregnant)            | 4,203 | 1  | Ten trained staff screened women at an antenatal clinic for TB symptoms (cough, hemoptysis, fever, weight loss, night sweats, swelling of lymph nodes, joint pain, neck stiffness, disorientation). TB suspects provided sputum for microscopy, Xpert, and/or culture. |

|                                      |          |           |                          |         |       |                                                                                                                                                                                                                                                                                                                                                                                |
|--------------------------------------|----------|-----------|--------------------------|---------|-------|--------------------------------------------------------------------------------------------------------------------------------------------------------------------------------------------------------------------------------------------------------------------------------------------------------------------------------------------------------------------------------|
| <b>Vo et al.</b> <sup>193</sup>      | Vietnam  | 2017-2019 | At-Risk (Mixed)          | 321,020 | 1,306 | A symptom-based screening (cough, hemoptysis, chest pain, dyspnea, fever, night sweats, fatigue, weight loss, and history of TB) of TB contacts and urban priority groups. All household contacts were referred to CXR. Others were referred for CXR if reporting at least one symptom. Individuals with CXR abnormalities were tested with Xpert MTB/RIF or smear microscopy. |
| <b>Volkman et al.</b> <sup>194</sup> | Kenya    | 2014-2015 | At-Risk (Contacts)       | 350     | 1     | During a routine health strategy outreach, a TB symptom screen was added in Kisumu county. The intervention sought to identify close contacts of patients with TB, who were then screened for symptoms of TB.                                                                                                                                                                  |
| <b>Vyas et al.</b> <sup>195</sup>    | India    | 2014-2015 | At-Risk (Health workers) | 65,230  | 964   | Community health workers screened for TB symptoms in Saharia communities, made referrals and collected sputum.                                                                                                                                                                                                                                                                 |
| <b>Wali et al.</b> <sup>196</sup>    | Pakistan | 2019      | At-Risk (Prison)         | 566     | 5     | A cross sectional study conducted in Central Jail Gaddani in Balochistan province to screen for active TB among inmates, jail staff, and family of the staff using CXR followed up by sputum GeneXpert.                                                                                                                                                                        |

|                                       |              |           |                          |        |    |                                                                                                                                                                                                                                                      |
|---------------------------------------|--------------|-----------|--------------------------|--------|----|------------------------------------------------------------------------------------------------------------------------------------------------------------------------------------------------------------------------------------------------------|
| <b>Wang et al.</b> <sup>197</sup>     | Taiwan       | 2003      | At-risk (Health workers) | 6,734  | 8  | A prevalence survey of hospital workers using CXR and confirming through further examination, CT, sputum smear microscopy and culture, and PCR.                                                                                                      |
| <b>Wei et al.</b> <sup>198</sup>      | China        | 2013-2014 | At-Risk (Smokers)        | 3,026  | 8  | Smokers in a primary care practices were screened for risk of TB (diabetes, cough, fever, contact with patient with TB, age > 60 years). High risk patients were referred for CXR. If abnormal CXR, patients were referred to local TB dispensaries. |
| <b>Weinrich et al.</b> <sup>199</sup> | Germany      | 2015      | At-Risk (Refugees)       | 17,487 | 10 | A screening of migrants/refugees during the 2015 refugee crisis. Refugees arriving in Germany received CXR in order to assess prevalence and Number Needed to Screen.                                                                                |
| <b>Whalen et al.</b> <sup>200</sup>   | Uganda       | 1995-2004 | At-risk (Contacts)       | 1,918  | 49 | A contact tracing study using history and physical examinations and confirming by sputum smear microscopy, CXR and culture.                                                                                                                          |
| <b>Wood et al.</b> <sup>201</sup>     | South Africa | 2005      | At-risk (Marginalized)   | 762    | 23 | A prevalence survey in a high HIV-prevalence community consisting mostly of individuals living in                                                                                                                                                    |

shacks. Subjects were screened using sputum smear microscopy and culture.

**Wu et al.**<sup>202</sup>

Taiwan

2002-2003

At-risk (Immigrants)

493

7

A retrospective study of mandatory screening records for foreign brides. Tuberculosis screening consisted of CXR in symptomatic individuals.

**Yassin et al.**<sup>203</sup>

Ethiopia

2010-2011

At-Risk (HHC)

8,005

69

Household contact screening based on cases identified through a door-to-door survey in Sidama Zone. HHCs were screened were screened for chronic cough and offered sputum smear microscopy or CXR if positive.

**Yimer et al.**<sup>204</sup>

Ethiopia

2008

General

47,478

38

A prevalence survey of smear-positive TB in Amhara Region screening house-to-house for symptoms (cough, chest pain, difficulty breathing) and confirming by sputum smear microscopy.

|                                        |            |           |                    |        |     |                                                                                                                                                                                                                                                                                                                                     |
|----------------------------------------|------------|-----------|--------------------|--------|-----|-------------------------------------------------------------------------------------------------------------------------------------------------------------------------------------------------------------------------------------------------------------------------------------------------------------------------------------|
|                                        |            |           |                    |        |     | An evaluation of a novel screening algorithm using blood C-reactive protein (CRP) and urine TB lipoarabinomannan assay (TB LAM) among PLHIV. All participants were screened for TB symptoms (cough, fever, night sweats, and weight loss), elevated CRP, and TB LAM, and had sputum smear microscopy, Xpert, and culture performed. |
| <b>Yoon et al.</b> <sup>205</sup>      | Uganda     | 2013-2015 | At-Risk (PLHIV)    | 1,245  | 203 |                                                                                                                                                                                                                                                                                                                                     |
| <b>Zachariah et al.</b> <sup>206</sup> | Malawi     | 2001-2002 | At-risk (Contacts) | 348    | 4   | A study comparing passive and active case-finding among household contacts of smear-positive TB patients. In the active case-finding arm contacts were screened for cough for more than three weeks and if present were asked to provide sputum for smear microscopy and had CXR taken.                                             |
| <b>Zaman et al.</b> <sup>207</sup>     | Bangladesh | 2001      | General            | 59,395 | 52  | A prevalence survey study of smear-positive TB in a rural area using symptom screening (cough for at least three weeks) and confirming by sputum smear microscopy and CXR.                                                                                                                                                          |

---

|                                    |       |      |                    |        |    |                                                                                                                                                                |
|------------------------------------|-------|------|--------------------|--------|----|----------------------------------------------------------------------------------------------------------------------------------------------------------------|
| <b>Zhang et al.</b> <sup>208</sup> | China | 2007 | At-Risk (Contacts) | 13,310 | 90 | A close contact screening based on records from 35 counties in Shandong Province. Contacts underwent symptom screening and subsequent sputum smear microscopy. |
|------------------------------------|-------|------|--------------------|--------|----|----------------------------------------------------------------------------------------------------------------------------------------------------------------|

---
