# Supplementary material
Source: HighWire-hosted journal article supplement (https://erj.ersjournals.com/content/58/4/2100090)
Supplement: inline-supplementary-material-3 [file inline-supplementary-material-3.pdf]

## ANNEX C: SUMMARY OF RISK OF BIAS ASSESSMENT

**Table 4. Summary of risk of bias assessment.**

| Name                                     | Ref | External validity |   |   |   | Internal validity |   |   |   |   |    | SUM |
|------------------------------------------|-----|-------------------|---|---|---|-------------------|---|---|---|---|----|-----|
|                                          |     | 1                 | 2 | 3 | 4 | 5                 | 6 | 7 | 8 | 9 | 10 |     |
| Abrahamo                                 | 37  | H                 | L | L | L | L                 | L | L | L | L | L  | L   |
| Adane                                    | 38  | H                 | L | L | L | L                 | L | L | L | L | H  | H   |
| Akhtar                                   | 39  | H                 | H | H | L | L                 | L | L | L | L | L  | H   |
| Al-Darraji                               | 40  | H                 | L | L | L | L                 | L | L | L | L | L  | L   |
| Alemayehu                                | 41  | H                 | H | H | H | L                 | L | L | L | L | L  | H   |
| Ali                                      | 42  | H                 | L | L | H | L                 | L | L | L | L | L  | M   |
| Andre                                    | 43  | H                 | H | H | H | L                 | H | L | L | L | L  | H   |
| Anger                                    | 44  | H                 | L | L | L | L                 | L | L | L | L | L  | L   |
| Aunsborg                                 | 45  | H                 | L | L | L | L                 | L | H | L | L | L  | M   |
| Aye                                      | 46  | H                 | H | H | H | L                 | L | L | H | L | L  | H   |
| Ayles #1                                 | 47  | L                 | L | L | L | L                 | H | L | H | L | L  | M   |
| Ayles #2                                 | 48  | L                 | L | L | L | L                 | L | L | L | L | L  | L   |
| Badiaga                                  | 49  | H                 | L | L | H | L                 | L | L | L | L | L  | M   |
| Balcha                                   | 50  | H                 | L | L | L | L                 | L | L | L | L | H  | M   |
| Banu #1                                  | 51  | H                 | L | H | H | L                 | L | H | L | L | L  | H   |
| Banu #2                                  | 52  | H                 | L | H | L | L                 | L | L | L | L | L  | M   |
| Banu #3                                  | 53  | H                 | L | L | L | L                 | L | L | L | L | L  | L   |
| Bassett                                  | 54  | H                 | L | L | L | L                 | L | L | L | L | L  | L   |
| Berhe                                    | 55  | L                 | L | L | H | L                 | L | L | L | L | L  | L   |
| Beyanga                                  | 56  | H                 | H | L | H | L                 | H | L | L | L | L  | H   |
| Bhat                                     | 57  | H                 | L | L | L | L                 | L | L | L | L | L  | H   |
| Bjerregaard-Andersen                     | 58  | H                 | L | L | L | L                 | H | L | L | L | L  | M   |
| Bogdanova                                | 59  | L                 | L | H | H | L                 | L | L | H | L | L  | M   |
| Borgen                                   | 60  | H                 | H | H | L | L                 | L | L | H | L | L  | H   |
| Bozorgmehr                               | 61  | H                 | L | L | L | L                 | L | L | H | L | L  | M   |
| Carbone                                  | 62  | H                 | H | L | L | L                 | H | L | L | L | L  | M   |
| Cavany                                   | 63  | L                 | L | L | L | L                 | L | L | H | L | L  | L   |
| Chen C                                   | 64  | H                 | L | L | L | L                 | L | L | H | L | L  | M   |
| Chen JO                                  | 65  | H                 | L | L | L | L                 | L | L | H | L | L  | M   |
| Cheng                                    | 26  | H                 | L | H | H | L                 | L | L | H | L | L  | H   |
| Chheng                                   | 66  | H                 | L | H | L | L                 | L | L | L | L | L  | M   |
| China Tuberculosis Control Collaboration | 67  | L                 | L | L | L | L                 | L | L | L | L | L  | L   |
| Corbett #1                               | 68  | H                 | L | L | L | L                 | L | L | L | L | L  | L   |
| Corbett #2                               | 69  | H                 | L | L | L | L                 | L | L | L | L | L  | L   |
| Corbett #3                               | 70  | H                 | L | H | L | L                 | L | L | L | L | L  | H   |
| Cowger                                   | 71  | L                 | L | L | H | L                 | L | L | L | L | L  | L   |
| Crepet                                   | 72  | L                 | L | L | H | L                 | L | L | L | L | L  | L   |





|                 |     |   |   |   |   |   |   |   |   |   |   |   |
|-----------------|-----|---|---|---|---|---|---|---|---|---|---|---|
| Romero-Sandoval | 163 | H | L | L | H | L | H | L | L | L | L | H |
| Rumman          | 23  | H | L | H | H | L | H | H | L | L | L | H |
| Sanaie          | 164 | L | H | L | H | L | H | L | L | L | L | M |
| Sanchez #1      | 165 | H | L | L | L | L | L | L | L | L | L | L |
| Sanchez #2      | 166 | H | L | L | L | L | L | L | L | L | L | L |
| Santha          | 167 | H | L | H | L | L | H | L | L | L | L | H |
| Santos          | 168 | H | L | L | L | L | L | L | L | L | L | L |
| Saunders        | 169 | H | L | L | L | H | H | L | H | H | H | H |
| Schepisi        | 170 | H | H | H | H | L | L | L | H | L | L | H |
| Sculier         | 171 | H | L | L | L | L | L | L | L | L | L | M |
| Sekandi #1      | 172 | H | L | H | H | L | L | L | L | L | L | M |
| Sekandi #2      | 173 | H | L | H | L | L | H | L | L | L | L | M |
| Sengai          | 174 | H | H | H | H | L | L | L | H | L | L | H |
| Shah #1         | 175 | L | L | L | L | L | H | L | L | L | L | L |
| Shah #2         | 176 | H | H | H | H | L | H | L | L | L | L | H |
| Shapiro         | 177 | H | L | L | L | L | L | L | L | L | L | L |
| Shargie         | 178 | H | L | L | H | H | H | L | L | L | L | H |
| Shenoi          | 179 | H | H | H | H | L | L | L | L | L | L | H |
| Shriraam        | 180 | H | L | L | L | L | H | L | L | L | L | M |
| Soemantri       | 181 | L | L | L | L | L | H | H | L | L | L | M |
| Ssemmondo       | 182 | H | L | L | L | L | H | L | L | L | L | M |
| Su              | 183 | H | L | L | L | L | L | L | L | L | L | L |
| Tefera          | 184 | H | L | H | L | L | L | L | L | L | L | M |
| Thind           | 185 | H | L | L | H | L | L | L | L | L | L | L |
| Thorson         | 186 | H | L | L | H | H | H | H | L | L | L | H |
| Tripodi         | 187 | H | H | H | H | L | H | H | L | L | L | H |
| Tupasi          | 188 | L | L | L | H | L | L | L | L | L | L | L |
| Van Duc         | 189 | H | L | L | H | L | H | L | L | L | L | H |
| Verver          | 190 | H | L | H | H | L | L | L | L | L | L | M |
| Vieira          | 191 | H | L | L | L | L | L | H | L | L | L | L |
| Vijayageetha    | 192 | H | H | L | H | L | L | L | L | L | L | M |
| Vo              | 193 | H | L | L | H | L | L | L | H | L | L | M |
| Volkmann        | 194 | H | L | H | H | L | H | H | H | L | L | H |
| Vyas            | 195 | H | H | L | H | L | H | L | H | L | L | H |
| Wali            | 196 | H | L | L | L | L | L | L | L | L | L | L |
| Wang            | 197 | H | L | L | L | L | L | L | L | L | L | L |
| Wei             | 198 | H | H | L | H | L | L | L | L | L | L | M |
| Weinrich        | 199 | H | L | L | L | L | L | L | L | L | L | L |
| Whalen          | 200 | H | L | L | H | L | L | H | L | L | L | M |
| Wood            | 201 | H | L | L | L | L | L | L | L | L | L | L |
| Wu              | 202 | H | L | L | L | L | H | H | H | L | L | H |
| Yassin          | 203 | H | L | L | L | L | L | L | L | L | L | L |
| Yimer           | 204 | H | L | L | H | H | H | L | L | L | L | H |
| Yoon            | 205 | H | L | L | L | L | L | L | L | L | L | L |
| Zachariah       | 206 | H | L | L | H | L | L | H | L | L | L | M |
| Zaman           | 207 | H | L | L | L | H | H | H | L | L | L | H |

| Zhang       | 208 | H           | L          | L          | H          | L        | H          | L          | L          | L        | L        | M          |
|-------------|-----|-------------|------------|------------|------------|----------|------------|------------|------------|----------|----------|------------|
| High, n (%) |     | 148<br>(84) | 31<br>(18) | 41<br>(23) | 82<br>(47) | 8<br>(5) | 44<br>(25) | 18<br>(10) | 27<br>(15) | 4<br>(2) | 5<br>(3) | 51<br>(29) |

H=high risk; M=moderate risk; L=low risk.

\*mean total points

- 1: Was the study's target population a close representation of the national population in relation to relevant variables?
- 2: Was the sampling frame a true or close representation of the target population?
- 3: Was some form of random selection used to select the sample, OR was a census undertaken?
- 4: Was the likelihood of nonresponse bias minimal?
- 5: Were data collected directly from the subjects (as opposed to a proxy)?
- 6: Was an acceptable case definition used in the study?
- 7: Was the study instrument that measured the parameter of interest shown to have validity and reliability?
- 8: Was the same mode of data collection used for all subjects?
- 9: Was the length of the shortest prevalence period for the parameter of interest appropriate?
- 10: Were the numerator(s) and denominator(s) for the parameter of interest appropriate?<sup>16</sup>
