# Supplementary material
Source: HighWire-hosted journal article supplement (https://erj.ersjournals.com/content/58/4/2100090)
Supplement: inline-supplementary-material-4 [file inline-supplementary-material-4.pdf]

## ANNEX D: DETAILS OF YIELD META-ANALYSIS BY BURDEN AND TB INCIDENCE

Table 5. Results of yield meta-analysis by Tuberculosis incidence and burden. Yields per 100,000 population.

|                            | Low incidence          |                     | Moderate incidence     |                    | Medium incidence        |                  | High incidence            |                  | High TB burden           |                  | non-High TB burden     |                    |
|----------------------------|------------------------|---------------------|------------------------|--------------------|-------------------------|------------------|---------------------------|------------------|--------------------------|------------------|------------------------|--------------------|
|                            | Yield<br>(CI95%)       | NNS<br>(CI95%)      | Yield<br>(CI95%)       | NNS<br>(CI95%)     | Yield<br>(CI95%)        | NNS<br>(CI95%)   | Yield<br>(CI95%)          | NNS<br>(CI95%)   | Yield<br>(CI95%)         | NNS<br>(CI95%)   | Yield<br>(CI95%)       | NNS<br>(CI95%)     |
| General populations        | 4<br>(0-8)             | 25,000<br>(12,500-) | 158<br>(44-272)        | 633<br>(368-2,273) | 500<br>(421-579)        | 200<br>(173-238) | 603<br>(457-749)          | 166<br>(134-219) | 504<br>(438-571)         | 198<br>(175-228) | 248<br>(60-436)        | 403<br>(229-1,667) |
| At-risk groups             | 572<br>(446-698)       | 175<br>(143-224)    | 1,194<br>(1,035-1,353) | 84<br>(74-97)      | 1,563<br>(1,453-1,672)  | 64<br>(60-69)    | 4,159<br>(3,525-4,794)    | 24<br>(21-28)    | 1,734<br>(1,625-1,843)   | 58<br>(54-62)    | 987<br>(891-1,082)     | 101<br>(92-112)    |
| Drug users                 | 1,122<br>(822-1,530)   | 89<br>(65-122)      | -                      | -                  | 4,000<br>(1,846-8,451)  | 25<br>(12-54)    | -                         | -                | 4,000<br>(1,846-8,451)   | 25<br>(12-54)    | 1,122<br>(822-1,530)   | 89<br>(65-122)     |
| Health workers             | -                      | -                   | 119<br>(60-234)        | 840<br>(427-1,667) | 1,481<br>(1,388-1,573)  | 68<br>(64-72)    | 680<br>(402-958)          | 147<br>(104-249) | 2,501<br>(738-4,265)     | 40<br>(23-136)   | 148<br>(68-227)        | 676<br>(441-1,471) |
| Contacts/HHCs              | 1,993<br>(1,079-2,907) | 50<br>(34-93)       | 595<br>(350-840)       | 168<br>(119-286)   | 1,719<br>(1,488-1,951)  | 58<br>(51-67)    | 3,052<br>(2,189-3,916)    | 33<br>(26-46)    | 1,633<br>(1,424-1,842)   | 61<br>(54-70)    | 2,065<br>(1,499-2,632) | 48<br>(38-67)      |
| PLHIV                      | -                      | -                   | 6,159<br>(3,568-8,750) | 16<br>(11-28)      | 8,843<br>(6,516-11,171) | 11<br>(9-15)     | 10,085<br>(5,811-14,360)  | 10<br>(7-17)     | 10,002<br>(7,349-12,656) | 10<br>(8-14)     | 7,163<br>(4,454-9,872) | 14<br>(10-22)      |
| Poor and<br>marginalized   | 905<br>(249-3,239)     | 110 (31-<br>402)    | 1,031<br>(748-1,315)   | 97<br>(76-134)     | 995<br>(820-1,170)      | 101<br>(85-122)  | 2,159<br>(1,450-2,869)    | 46<br>(35-69)    | 1,130<br>(956-1,305)     | 88<br>(77-105)   | 2,694<br>(1,929-3,458) | 37<br>(29-52)      |
| Prison inmates             | -                      | -                   | 3,105<br>(2,254-3,956) | 32<br>(25-44)      | 1,174<br>(860-1,487)    | 85<br>(67-116)   | 22,685<br>(20,287-25,277) | 4<br>(4-5)       | 2,447<br>(2,020-2,873)   | 41<br>(35-50)    | 3,274<br>(939-5,609)   | 31<br>(18-106)     |
| Refugees and<br>immigrants | 244<br>(163-324)       | 410<br>(309-613)    | 1,420<br>(689-2,902)   | 70<br>(34-145)     | 246<br>(230-263)        | 407<br>(380-435) | -                         | -                | 346<br>(284-423)         | 289<br>(236-352) | 246<br>(173-320)       | 407<br>(313-578)   |
| Mixed groups               | 502<br>(352-715)       | 199<br>(140-284)    | 497<br>(316-679)       | 201<br>(147-316)   | 2,112<br>(1,612-2,611)  | 47<br>(38-62)    | 379<br>(230-624)          | 264<br>(160-435) | 1,400<br>(1,022-1,779)   | 71<br>(56-98)    | 548<br>(365-730)       | 182<br>(137-274)   |

TB=Tuberculosis; HHC=household contact; PLHIV=People living with human immunodeficiency virus; NNS=Number needed to screen.

**Table 6. Results of yield/prevalence ratio meta-analysis by Tuberculosis incidence and burden. CI95% in parentheses.**

|                         | Low incidence | Moderate incidence  | Medium incidence    | High incidence     | High TB burden      | non-High TB burden |
|-------------------------|---------------|---------------------|---------------------|--------------------|---------------------|--------------------|
| General population      | -             | 1.0<br>(0.2-1.8)    | 1.4<br>(0.6-2.2)    | 1.5<br>(0.7-2.3)   | 1.4<br>(0.8-2.0)    | 1.3<br>(0.2-2.5)   |
| At-risk groups          | -             | 35.1<br>(19.3-50.9) | 9.1<br>(6.5-11.7)   | 8.0<br>(3.6-12.5)  | 12.9<br>(9.2-16.6)  | 9.2<br>(3.0-15.4)  |
| Drug users              | -             | -                   | 11.9<br>(11.1-12.7) | -                  | 11.9<br>(11.1-12.7) | -                  |
| Health workers          | -             | -                   | 19.4<br>(0-47.3)    | -                  | 19.4<br>(0-47.3)    | -                  |
| Contacts/HHCs           | -             | 5.5<br>(3.5-7.5)    | 9.0<br>(5.3-12.7)   | 6.5<br>(2.9-10.1)  | 7.8<br>(5.0-10.8)   | 9.0<br>(1.6-16.4)  |
| PLHIV                   | -             | 23.7<br>(23.1-24.4) | 21.0<br>(14.3-27.7) | 16.5<br>(2.6-30.4) | 20.2<br>(13.8-26.5) | 17.4<br>(0-38.2)   |
| Poor and marginalized   | -             | -                   | 2.7<br>(1.4-4.0)    | 3.5<br>(2.2-4.8)   | 2.7<br>(1.8-3.6)    | 5.6<br>(0.4-10.9)  |
| Prison inmates          | -             | 49.9<br>(32.1-67.7) | 2.9<br>(1.8-4.1)    | -                  | 26.5<br>(12.4-40.6) | 1.1<br>(0.8-1.5)   |
| Refugees and immigrants | -             | -                   | 1.1<br>(0.9-1.3)    | -                  | 1.2<br>(1.0-1.4)    | 1.0<br>(0.9-1.1)   |
| Mixed groups            | -             | 1.4<br>(0.7-2.1)    | 12.0<br>(0-28.0)    | 0.5<br>(0-1.1)     | 8.8<br>(0-20.6)     | -                  |

**TB=Tuberculosis; HHC=household contact; PLHIV=People living with human immunodeficiency virus.**

## Low incidence, at-risk groups

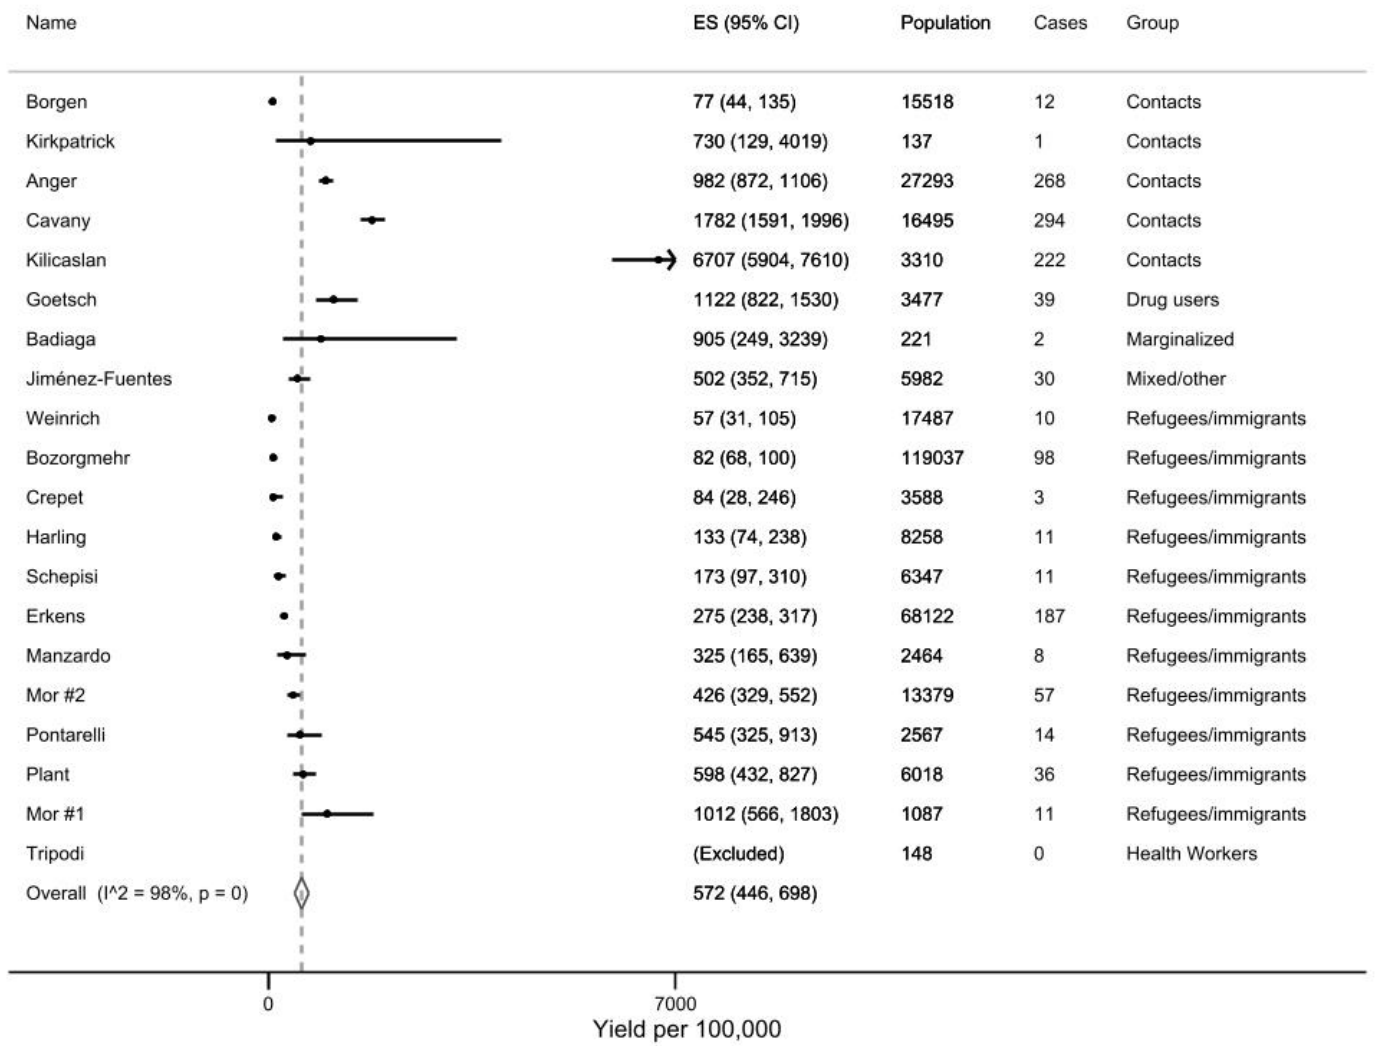

### Moderate incidence, general populations

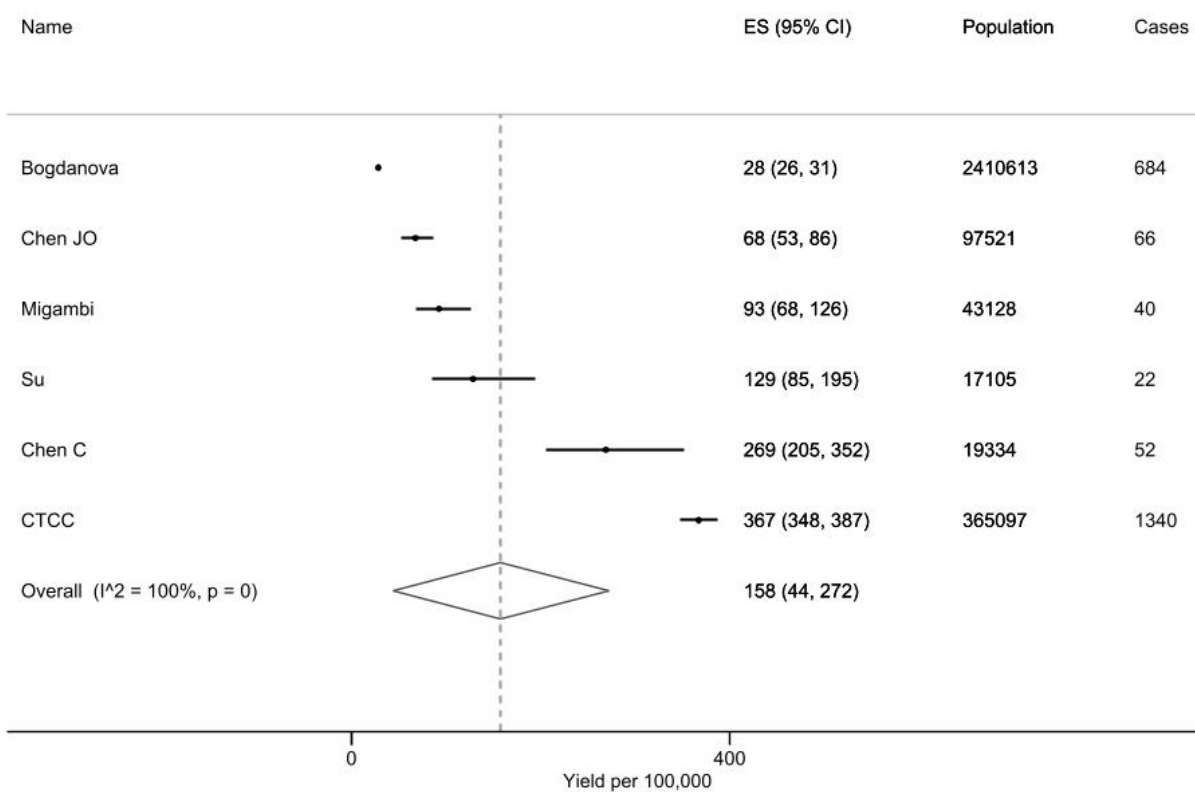

## Moderate incidence, at-risk groups

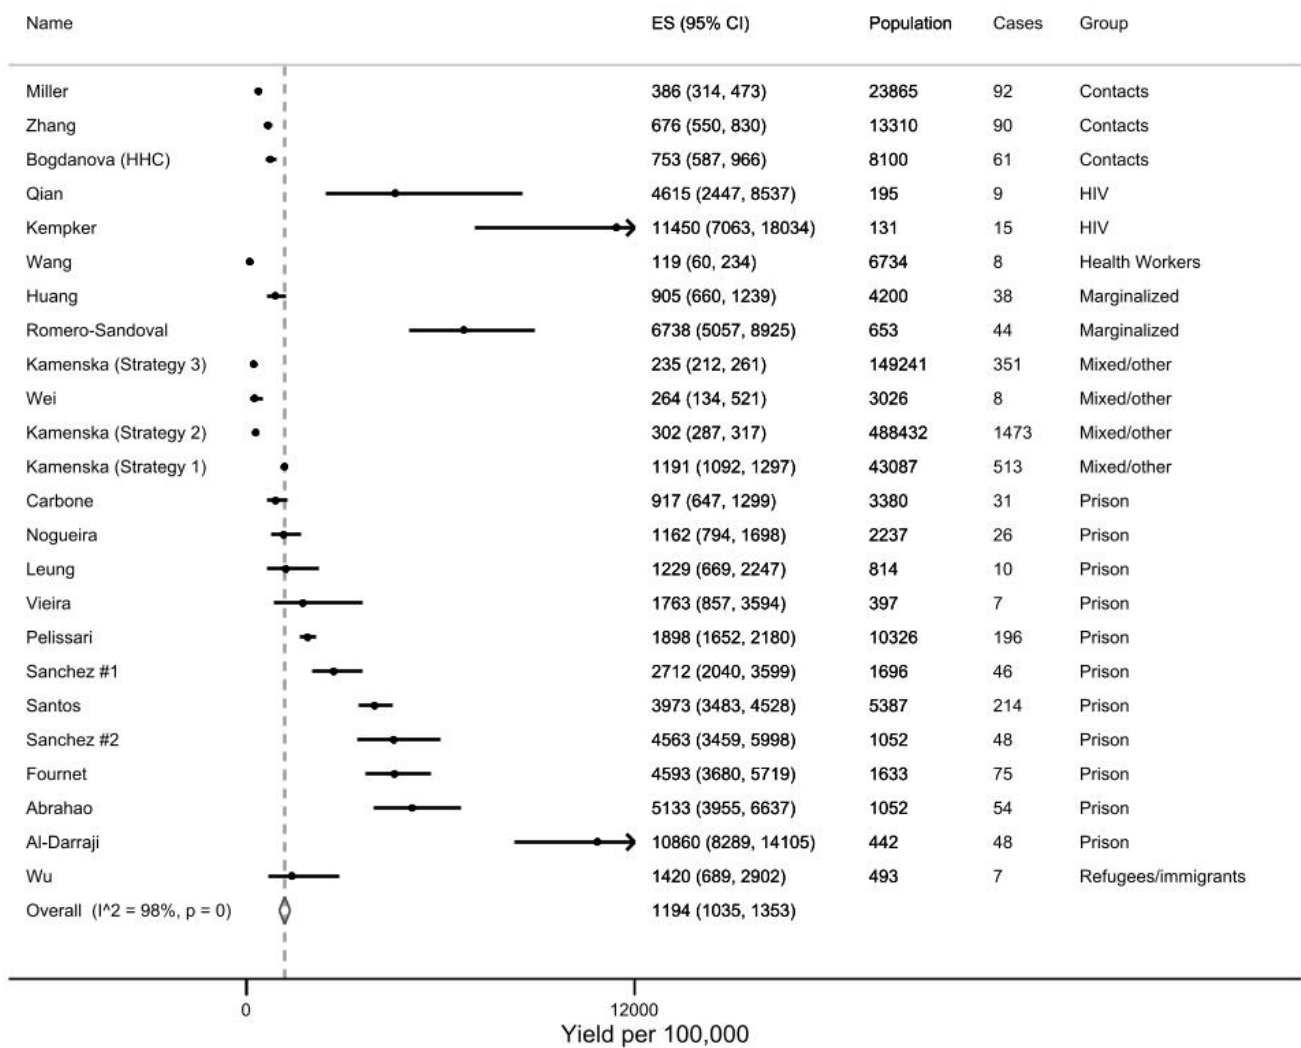

## Medium incidence, general populations

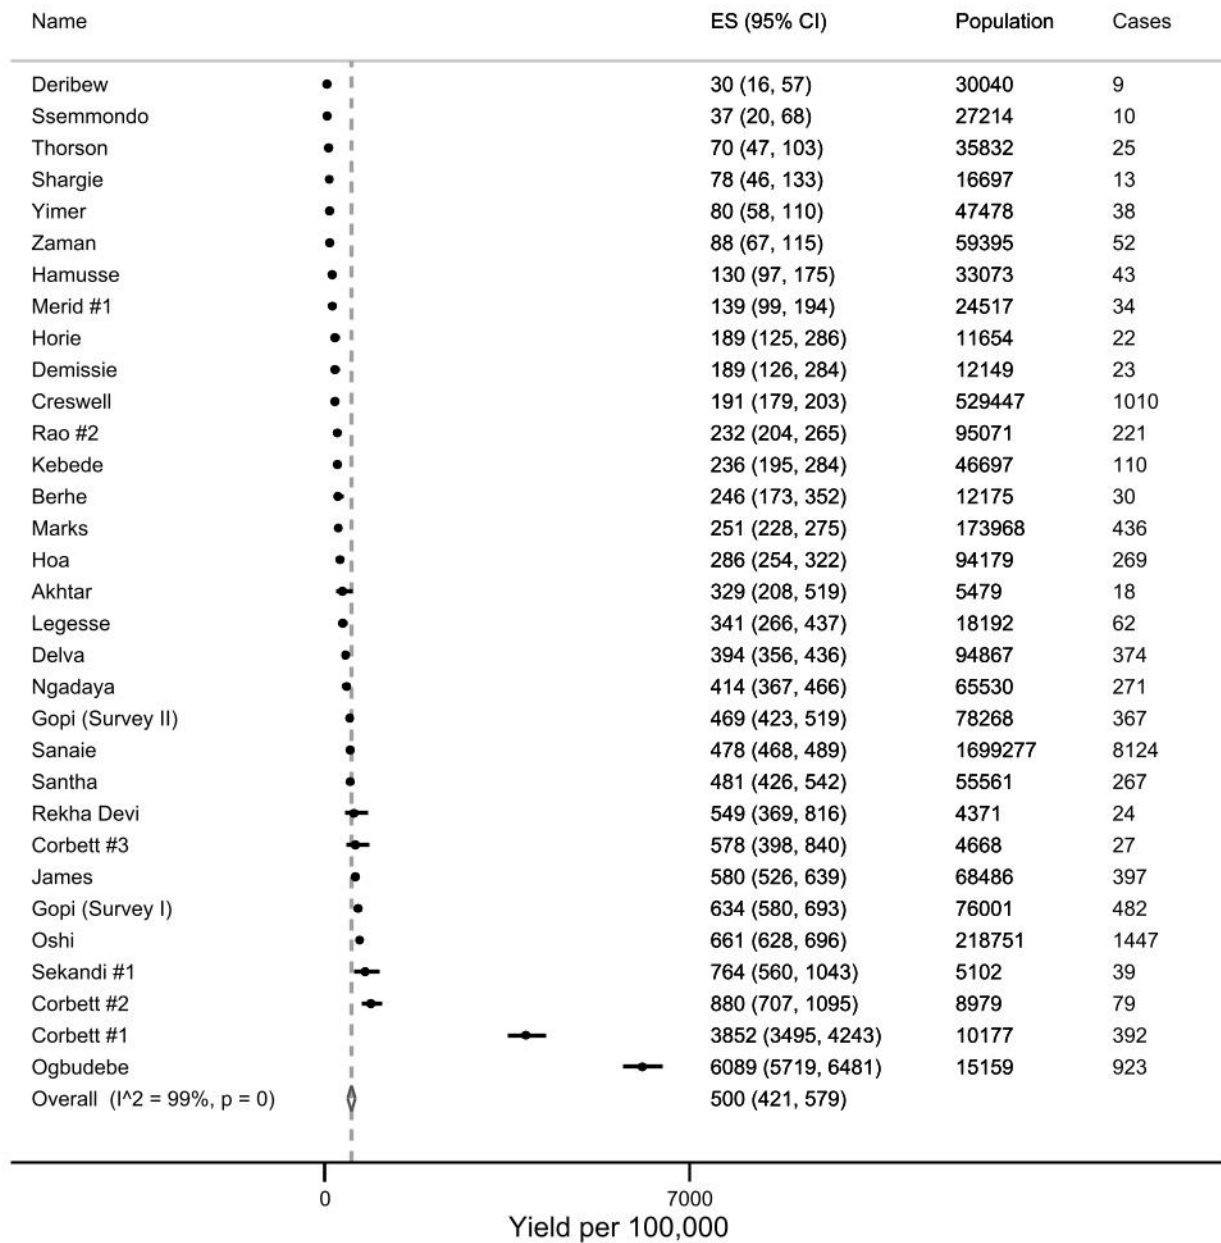

## Medium incidence, at-risk groups

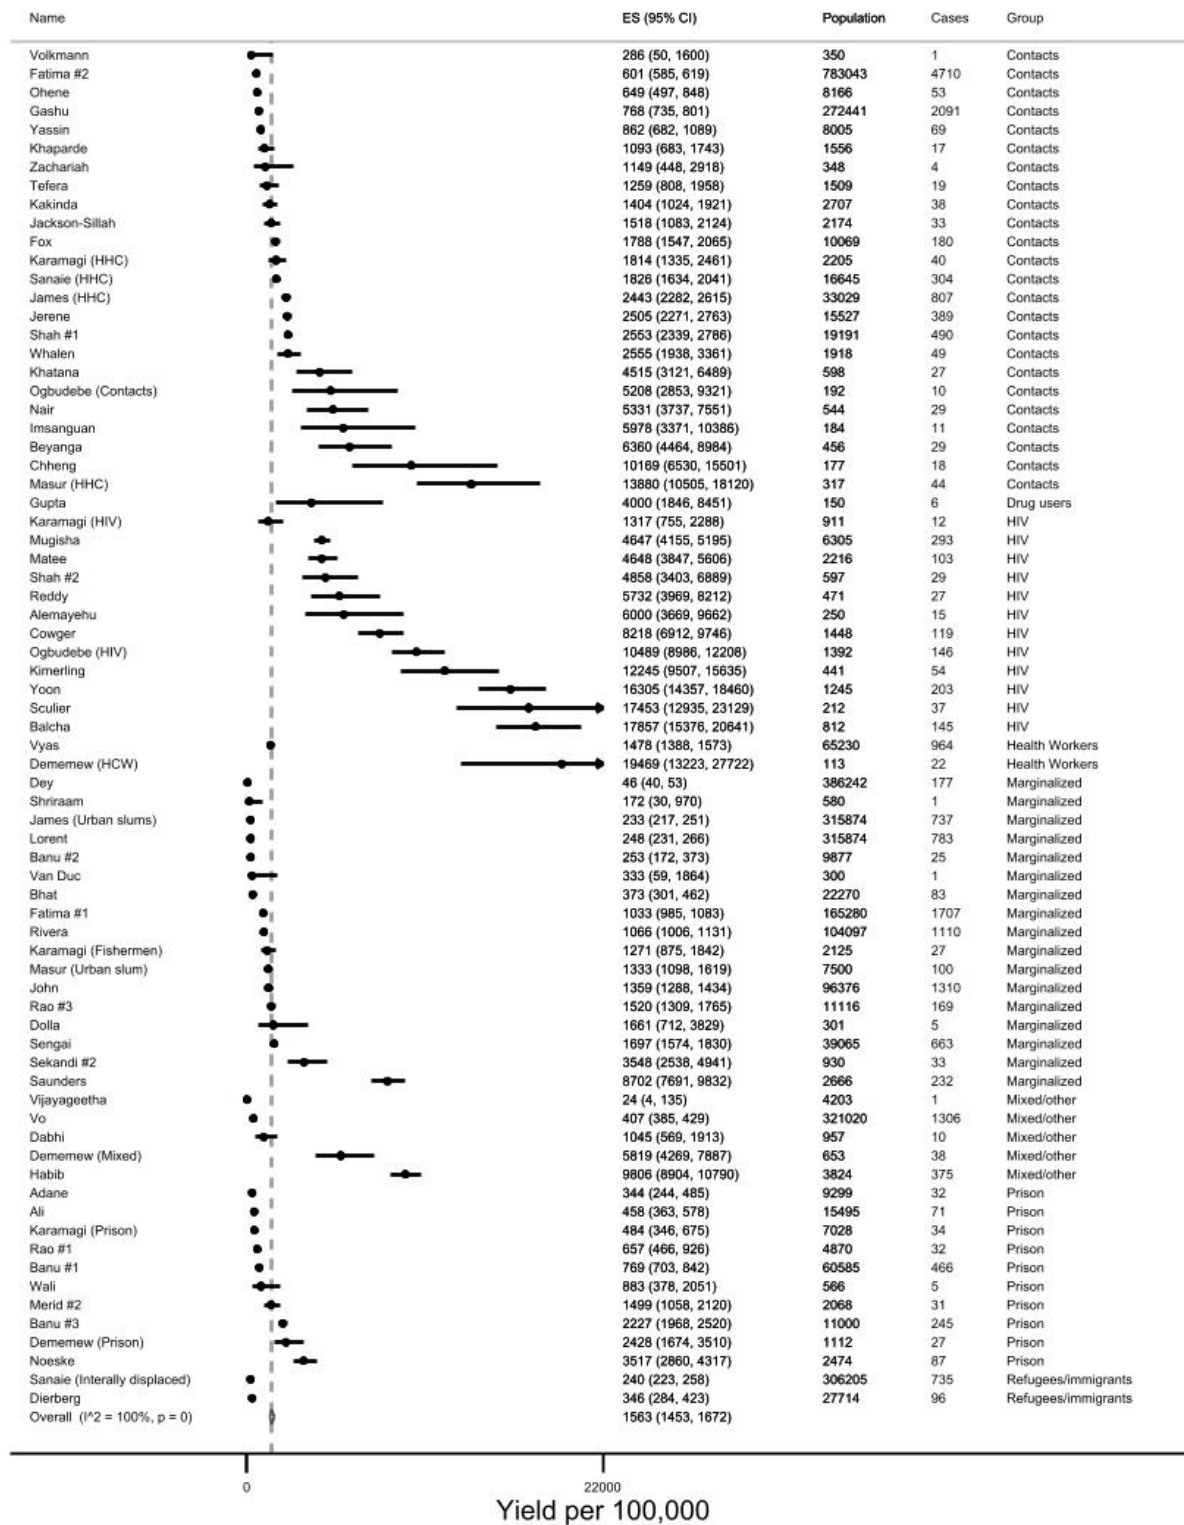

### High incidence, general populations

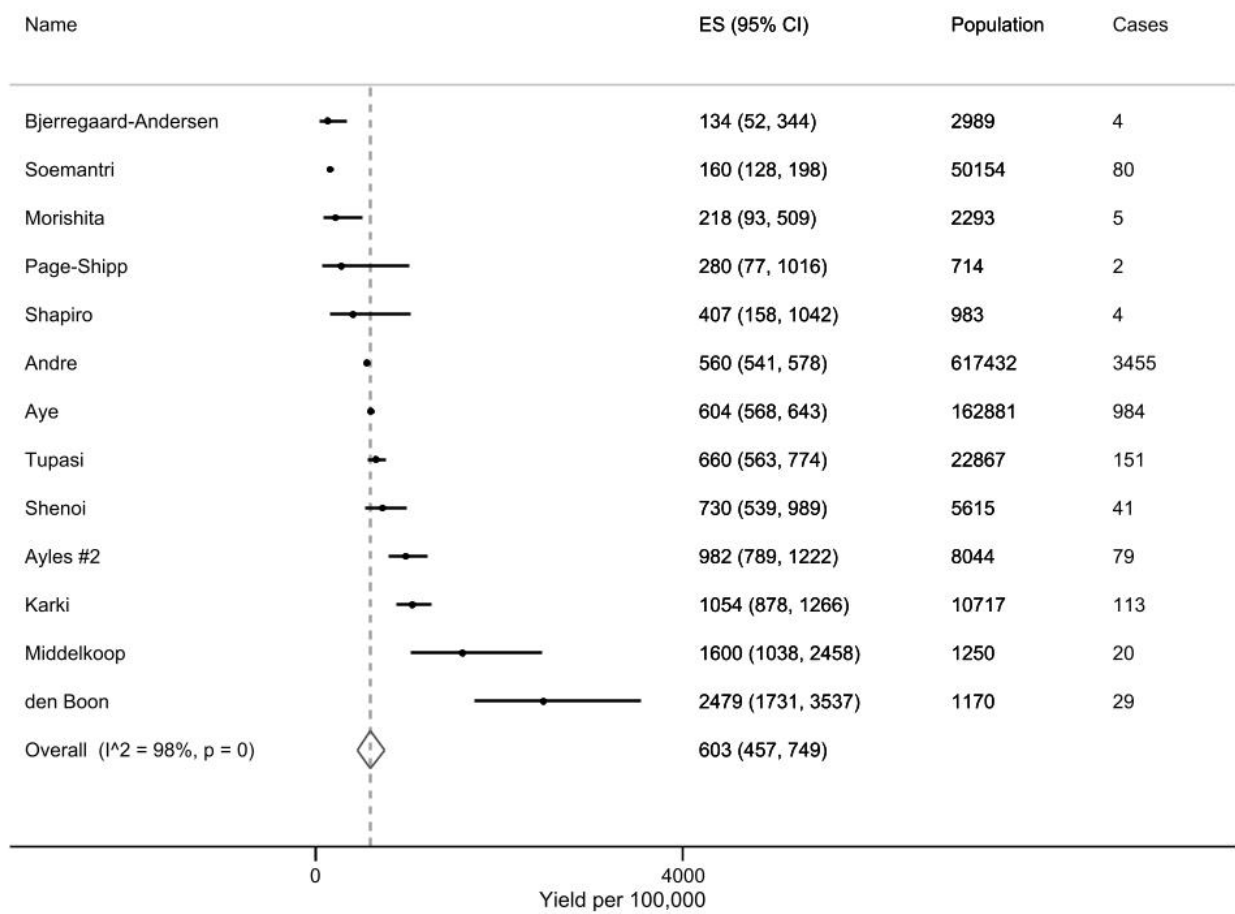



### High incidence, at-risk groups

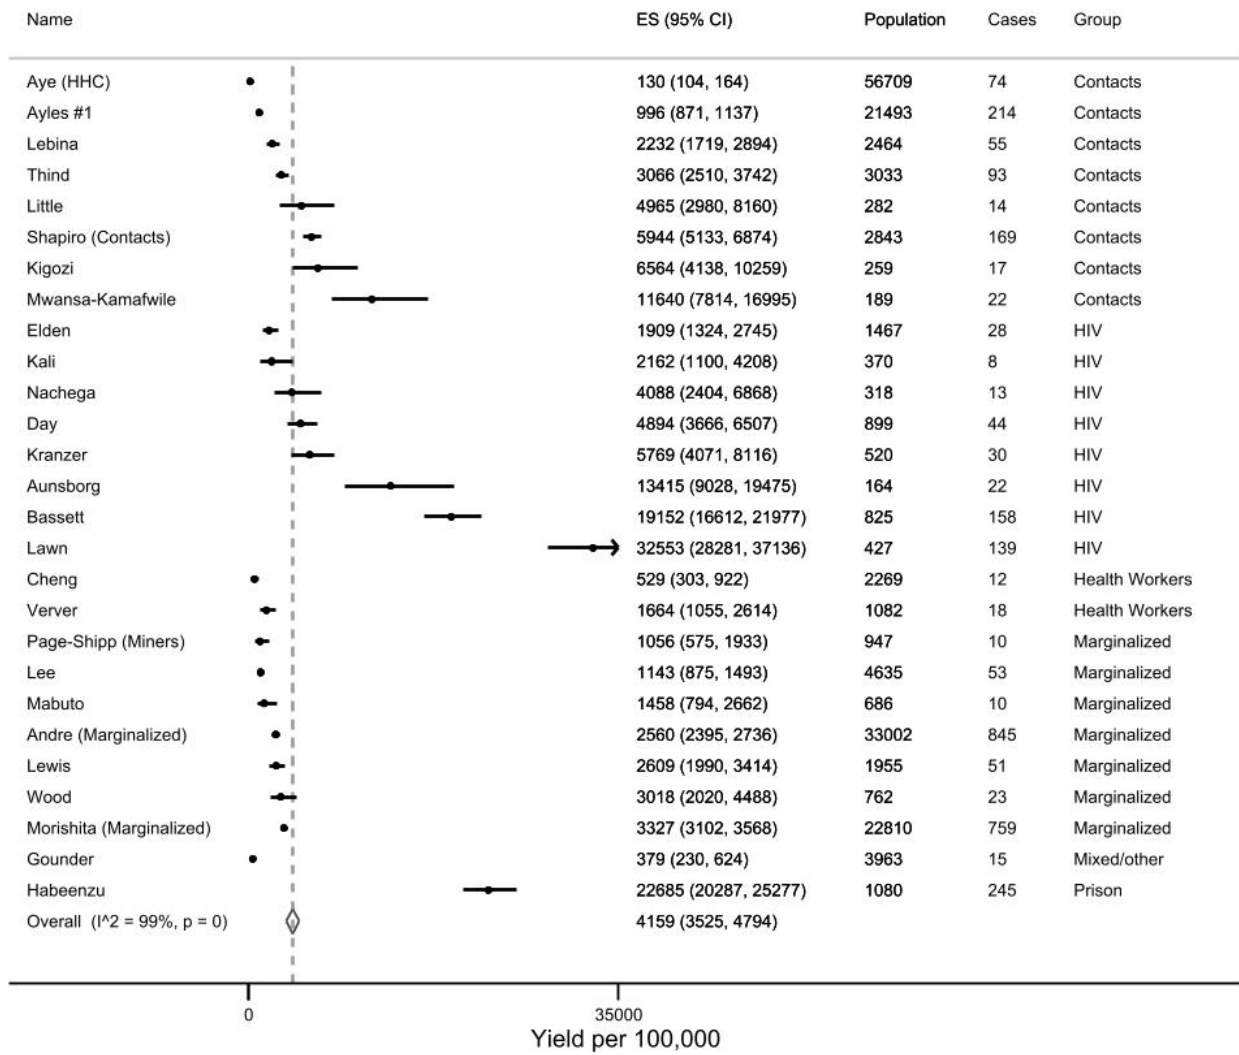

Figure 3.A-G. Forest plot of yields of studies by incidence levels and population type. ES=Yield estimates (prevalence of previously undiagnosed active Tuberculosis per 100,000 screened). “Low incidence countries, general populations” consisted of only two studies<sup>1,2</sup> and is consequently not presented as a forest plot here.
