# Supplementary material
Source: HighWire-hosted journal article supplement (https://erj.ersjournals.com/content/58/4/2100090)
Supplement: inline-supplementary-material-5 [file inline-supplementary-material-5.pdf]

## ANNEX E: DETAILS OF YIELD META-ANALYSIS BY REGION

Table 7. Results of yield meta-analysis by region. Yields per 100,000 population.

|                         | North America & Europe   |                        | Middle East             |                  | Asia                    |                    | South & Central America |                  | Africa                  |                  |
|-------------------------|--------------------------|------------------------|-------------------------|------------------|-------------------------|--------------------|-------------------------|------------------|-------------------------|------------------|
|                         | Yield<br>(CI95%)         | NNS<br>(CI95%)         | Yield<br>(CI95%)        | NNS<br>(CI95%)   | Yield<br>(CI95%)        | NNS<br>(CI95%)     | Yield<br>(CI95%)        | NNS<br>(CI95%)   | Yield<br>(CI95%)        | NNS<br>(CI95%)   |
| General population      | 29<br>(26-31)            | 3,448<br>(3,226-3,846) | 249<br>(0-508)          | 402<br>(197-)    | 358<br>(276-439)        | 279<br>(228-362)   | 394<br>(356-436)        | 254<br>(229-281) | 690<br>(567-812)        | 145<br>(123-176) |
| At-risk groups          | 481<br>(386-576)         | 208<br>(174-259)       | 1,718<br>(1,456-1,979)  | 58<br>(51-69)    | 995<br>(885-1,106)      | 101<br>(90-113)    | 3,098<br>(2,599-3,597)  | 32<br>(28-38)    | 3,062<br>(2,785-3,339)  | 33<br>(30-36)    |
| Drug users              | 1,122<br>(822-1,530)     | 89<br>(65-122)         | -                       | -                | -                       | -                  | -                       | -                | 4,000<br>(1,846-8,451)  | 25<br>(12-54)    |
| Health workers          | -                        | -                      | -                       | -                | 710<br>(0-1,740)        | 141<br>(57-)       | -                       | -                | 1,856<br>(1,098-2,614)  | 54<br>(38-91)    |
| Contacts/HHCs           | 876<br>(193-1,560)       | 114<br>(64-518)        | 2,831<br>(1,503-4,160)  | 35<br>(24-67)    | 2,132<br>(1,267-2,996)  | 47<br>(33-79)      | 391<br>(313-470)        | 256<br>(213-319) | 2,071<br>(1,708-2,434)  | 48<br>(41-59)    |
| PLHIV                   | 11,450<br>(7,063-18,034) | 9<br>(6-14)            | -                       | -                | 8,936<br>(5,655-12,217) | 11<br>(8-18)       | 5,732<br>(3,969-8,212)  | 17<br>(12-25)    | 9,224<br>(6,936-11,512) | 11<br>(9-14)     |
| Poor and marginalized   | 905<br>(249-3,239)       | 110<br>(31-402)        | 1,033<br>(985-1,083)    | 97<br>(92-102)   | 737<br>(604-870)        | 136<br>(115-166)   | 4,098<br>(2,636-5,560)  | 24<br>(18-38)    | 1,935<br>(1,517-2,353)  | 52<br>(42-66)    |
| Prison inmates          | -                        | -                      | 675<br>(457-893)        | 148<br>(112-219) | 2,805<br>(1,604-4,007)  | 36<br>(25-62)      | 2,879<br>(2,009-3,749)  | 35<br>(27-50)    | 2,244<br>(1,524-2,964)  | 45<br>(34-66)    |
| Refugees and immigrants | 202<br>(125-280)         | 495<br>(357-800)       | 394<br>(186-603)        | 254<br>(166-538) | 351<br>(282-420)        | 285<br>(238-355)   | -                       | -                | -                       | -                |
| Mixed groups            | 548<br>(365-730)         | 182<br>(137-274)       | 9,806<br>(8,904-10,790) | 10<br>(9-11)     | 328<br>(43-613)         | 305<br>(163-2,326) | -                       | -                | 439<br>(249-630)        | 228<br>(159-402) |

TB=Tuberculosis; HHC=household contact; PLHIV=People living with human immunodeficiency virus; NNS=Number needed to screen.

**Table 8. Results of yield/prevalence ratio meta-analysis by region. CI95% in parentheses.**

|                         | North America & Europe | Middle East         | Asia                | South & Central America | Africa              |
|-------------------------|------------------------|---------------------|---------------------|-------------------------|---------------------|
| General population      | 0.3<br>(0.2-0.3)       | 1.4<br>(0.8-2.1)    | 1.3<br>(0.9-1.7)    | -                       | 1.5<br>(0.5-2.6)    |
| At-risk groups          | 6.5<br>(6.3-6.8)       | 9.8<br>(0-19.7)     | 8.0<br>(4.6-11.5)   | 45.6<br>(27.5-63.7)     | 9.2<br>(6.2-12.2)   |
| Drug users              | -                      | -                   | -                   | -                       | 11.9<br>(11.1-12.7) |
| Health workers          | -                      | -                   | 5.2<br>(5.2-5.3)    | -                       | 33.6<br>(33.3-34.0) |
| Contacts/HHCs           | 6.5<br>(6.3-6.8)       | 7.3<br>(2.3-12.2)   | 10.7<br>(3.5-18.0)  | 6.5<br>(6.3-6.7)        | 7.1<br>(4.0-10.1)   |
| PLHIV                   | 17.4<br>(9.7-25.2)     | -                   | 25.6<br>(19.3-31.9) | -                       | -                   |
| Poor and marginalized   | -                      | 4.6<br>(2.2-4.9)    | 2.3<br>(0.8-3.8)    | -                       | 4.6<br>(4.6-4.7)    |
| Prison inmates          | -                      | 3.4<br>(2.4-4.4)    | 4.3<br>(2.0-6.7)    | 49.9<br>(32.1-67.7)     | 1.9<br>(0.5-3.2)    |
| Refugees and immigrants | -                      | 1.0<br>(0.9-1.1)    | 1.2<br>(1.0-1.4)    | -                       | -                   |
| Mixed groups            | -                      | 44.0<br>(43.9-44.1) | 1.9<br>(0.5-3.3)    | -                       | 5.3<br>(0-14.6)     |

**HHC=household contact; PLHIV=People living with human immunodeficiency virus.**
