# Supplementary material
Source: HighWire-hosted journal article supplement (https://erj.ersjournals.com/content/58/4/2100090)
Supplement: inline-supplementary-material-6 [file inline-supplementary-material-6.pdf]

## ANNEX F: META-REGRESSION

**Table 9. Multivariable random-effects meta-regression model for yields with residual regression statistics.**

|                          | Coefficient | CI95%            | Standard error | z     | p     |
|--------------------------|-------------|------------------|----------------|-------|-------|
| Risk of bias             | 0.0053      | -0.0036 ; 0.0141 | 0.0045         | 1.17  | 0.243 |
| Initial screening method | 0.0009      | -0.0032 ; 0.0050 | 0.0021         | 0.43  | 0.665 |
| Confirmatory test        | -0.0031     | -0.0116 ; 0.0055 | 0.0044         | -0.71 | 0.479 |
| Population group         | 0.0069      | 0.0044 ; 0.0093  | 0.0012         | 5.59  | 0.000 |
| Population size          | -0.0000     | -0.0000 ; 0.0000 | 0.0000         | -0.80 | 0.426 |
| Year                     | 0.0002      | -0.0011 ; 0.0015 | 0.0007         | 0.34  | 0.734 |
| TB incidence             | 0.0000      | -0.0000 ; 0.0001 | 0.0000         | 1.07  | 0.283 |
| HIV incidence            | 0.0467      | -0.0987 ; 0.1921 | 0.0742         | 0.63  | 0.529 |
| Constant                 | -0.4639     | -3.0571 ; 2.1294 | 1.3231         | -0.35 | 0.726 |

Tau<sup>2</sup> = 0.001497

I<sup>2</sup> (%) = 100.00

H<sup>2</sup> = 21002.67

R<sup>2</sup> (%) = 24.47

**TB=Tuberculosis; HIV=human immunodeficiency virus.**

**Table 10. Multivariable random-effects meta-regression model for yield/prevalence ratios with residual regression statistics.**

|                          | Coefficient | CI95%               | Standard error | z     | p     |
|--------------------------|-------------|---------------------|----------------|-------|-------|
| Risk of bias             | 3.677       | 0.481 ; 6.872       | 1.630          | 2.26  | 0.024 |
| Initial screening method | 2.482       | 0.997 ; 3.967       | 0.758          | 3.28  | 0.001 |
| Confirmatory test        | 0.143       | -3.276 ; 3.563      | 1.745          | 0.08  | 0.934 |
| Population group         | 2.278       | 1.404 ; 3.152       | 0.446          | 5.11  | 0.000 |
| Population size          | 0.000       | -0.000 ; 0.000      | 0.000          | 0.13  | 0.893 |
| Year                     | -0.174      | -0.637 ; 0.289      | 0.236          | -0.74 | 0.461 |
| TB incidence             | -0.031      | -0.055 ; -0.007     | 0.012          | -2.53 | 0.011 |
| HIV incidence            | 40.054      | -16.112 ; 96.220    | 28.657         | 1.40  | 0.162 |
| Constant                 | 340.689     | -593.210 ; 1274.588 | 476.488        | 0.71  | 0.475 |

Tau<sup>2</sup> = 165.2

I<sup>2</sup> (%) = 100.00

H<sup>2</sup> = 43206.72

R<sup>2</sup> (%) = 42.40

**TB=Tuberculosis; HIV=Human immunodeficiency virus.**
