# Supplementary material
Source: HighWire-hosted journal article supplement (https://erj.ersjournals.com/content/58/4/2100090)
Supplement: inline-supplementary-material-7 [file inline-supplementary-material-7.pdf]

## ANNEX G: SENSITIVITY ANALYSIS

Table 11. Sensitivity analysis for yield meta-analysis. Yields per 100,000 population. References for excluded studies in superscript.

|                         | General Populations |                                           |                   |                     |                      | At-Risk Groups         |                                                   |                        |                        |                        |
|-------------------------|---------------------|-------------------------------------------|-------------------|---------------------|----------------------|------------------------|---------------------------------------------------|------------------------|------------------------|------------------------|
|                         | Overall             | Excluding outliers <sup>68, 79, 149</sup> | High risk of bias | Medium risk of bias | Low risk of bias     | Overall                | Excluding outliers <sup>40, 77, 95, 96, 122</sup> | High risk of bias      | Medium risk of bias    | Low risk of bias       |
| Overall                 | 432<br>(382-482)    | 334<br>(285-383)                          | 351<br>(223-480)  | 342<br>(237-446)    | 725<br>(610-839)     | 1,401<br>(1,328-1,475) | 1,314<br>(1,242-1,386)                            | 1,540<br>(1,342-1,738) | 1,035<br>(927-1,143)   | 1,836<br>(1,703-1,969) |
| <b>Burden</b>           |                     |                                           |                   |                     |                      |                        |                                                   |                        |                        |                        |
| Non-HBC                 | 248<br>(60-436)     | 248<br>(60-436)                           | 3<br>(1-12)       | 327<br>(59-596)     | 205<br>(8-403)       | 987<br>(891-1,082)     | 937<br>(878-1,069)                                | 1,944<br>(1,515-2,373) | 798<br>(630-966)       | 969<br>(820-1,118)     |
| HBC                     | 504<br>(438-571)    | 363<br>(299-426)                          | 378<br>(240-517)  | 339<br>(257-421)    | 875<br>(737-1,013)   | 1,734<br>(1,625-1,843) | 1,580<br>(1,472-1,687)                            | 1,486<br>(1,215-1,757) | 1,159<br>(1,013-1,305) | 3,092<br>(2,830-3,355) |
| Non-TB/HIV HBC          | 246<br>(178-315)    | 246<br>(178-315)                          | 84<br>(20-148)    | 296<br>(92-501)     | 280<br>(184-375)     | 1,043<br>(955-1,130)   | 970<br>(884-1,056)                                | 1,790<br>(1,418-2,162) | 952<br>(814-1,090)     | 1,072<br>(930-1,213)   |
| TB/HIV HBC              | 604<br>(514-695)    | 398<br>(316-480)                          | 440<br>(273-606)  | 359<br>(250-467)    | 1,211<br>(992-1,430) | 2,202<br>(2,041-2,363) | 2,039<br>(1,881-2,197)                            | 1,534<br>(1,257-1,811) | 1,763<br>(1,483-2,042) | 4,058<br>(3,540-4,576) |
| <b>Incidence</b>        |                     |                                           |                   |                     |                      |                        |                                                   |                        |                        |                        |
| Low                     | 4<br>(0-8)          | 4<br>(0-8)                                | 3<br>(1-12)       | 275<br>(199-378)    | -                    | 572<br>(446-698)       | 572<br>(446-698)                                  | 1,252<br>(745-1,758)   | 238<br>(89-387)        | 576<br>(338-814)       |
| Moderate                | 158<br>(44-272)     | 158<br>(44-272)                           | -                 | 99<br>(44-155)      | 197<br>(0-400)       | 1,194<br>(1,035-1,353) | 1,154<br>(998-1,311)                              | 4,180<br>(440-7,921)   | 673<br>(434-913)       | 1,458<br>(1,250-1,667) |
| Medium                  | 500<br>(421-579)    | 322<br>(251-394)                          | 265<br>(139-392)  | 402<br>(270-540)    | 929<br>(758-1,099)   | 1,563<br>(1,453-1,672) | 1,465<br>(1,356-1,574)                            | 1,774<br>(1,404-2,145) | 928<br>(793-1,063)     | 2,447<br>(2,209-2,685) |
| High                    | 603<br>(457-749)    | 562<br>(416-707)                          | 603<br>(457-749)  | 383<br>(67-698)     | 820<br>(515-1,125)   | 4,159<br>(3,525-4,794) | 3,122<br>(2,528-3,716)                            | 2,250<br>(1,243-3,256) | 5,158<br>(4,014-6,302) | 6,920<br>(4,032-9,808) |
| <b>Region</b>           |                     |                                           |                   |                     |                      |                        |                                                   |                        |                        |                        |
| North America & Europe  | 29<br>(26-31)       | 29<br>(26-31)                             | -                 | 29<br>(26-31)       | -                    | 481<br>(386-576)       | 481<br>(386-576)                                  | 357<br>(131-583)       | 385<br>(158-613)       | 575<br>(438-713)       |
| Middle East             | 249<br>(0-508)      | 249<br>(0-508)                            | 4<br>(0-8)        | 352<br>(345-360)    | -                    | 1,718<br>(1,456-1,979) | 1,304<br>(1,055-1,553)                            | 1,058<br>(838-1,277)   | 1,023<br>(414-1,613)   | 2,599<br>(1,760-3,438) |
| Asia                    | 358<br>(276-439)    | 358<br>(276-439)                          | 310<br>(57-562)   | 437<br>(264-461)    | 293<br>(222-364)     | 995<br>(885-1,106)     | 980<br>(870-1,090)                                | 742<br>(492-992)       | 909<br>(755-1,063)     | 2,525<br>(1,753-3,296) |
| South & Central America | 394                 | 394                                       | -                 | -                   | 394                  | 3,098                  | 3,098                                             | 7,227                  | 789                    | 3,205                  |

|                       |           |           |           |           |               |                |               |               |                |                |
|-----------------------|-----------|-----------|-----------|-----------|---------------|----------------|---------------|---------------|----------------|----------------|
|                       | (356-436) | (356-436) |           |           | (356-436)     | (2,599-3,597)  | (2,599-3,597) | (5,342-9,113) | (284-1,293)    | (2,458-3,952)  |
| Africa                | 690       | 369       | 420       | 234       | 1,367         | 3,062          | 2,638         | 2,083         | 4,205          | 4,351          |
|                       | (567-812) | (260-477) | (234-607) | (110-358) | (1,049-1,686) | (2,785-3,339)  | (2,378-2,897) | (1,642-2,525) | (3,487-4,923)  | (3,689-5,013)  |
| <b>Group</b>          |           |           |           |           |               |                |               |               |                |                |
| Drug users            | -         | -         | -         | -         | -             | 1,157          | 1,157         | 1,157         | -              | -              |
|                       |           |           |           |           |               | (809-1,505)    | (809-1,505)   | (809-1,505)   |                |                |
| Health workers        | -         | -         | -         | -         | -             | 1,201          | 921           | 1,395         | 1,664          | 121            |
|                       |           |           |           |           |               | (279-2,122)    | (15-1,827)    | (1,306-1,483) | (1,055-2,614)  | (39-204)       |
| Contacts/HHCs         | -         | -         | -         | -         | -             | 1,690          | 1,690         | 1,444         | 1,677          | 1,777          |
|                       |           |           |           |           |               | (1,511-1,869)  | (1,511-1,869) | (1,112-1,776) | (1,163-2,190)  | (1,553-2,001)  |
| PLHIV                 | -         | -         | -         | -         | -             | 9,092          | 8,084         | 4,394         | 12,525         | 11,663         |
|                       |           |           |           |           |               | (7,229-10,995) | (6,362-9,805) | (2,925-5,863) | (7,487-17,562) | (6,756-16,570) |
| Poor & marginalized   | -         | -         | -         | -         | -             | 1,330          | 1,330         | 1,949         | 1,088          | 1,299          |
|                       |           |           |           |           |               | (1,165-1,495)  | (1,165-1,495) | (1,361-2,537) | (846-1,330)    | (1,022-1,577)  |
| Prison inmates        | -         | -         | -         | -         | -             | 2,371          | 1,840         | 563           | 4,574          | 2,928          |
|                       |           |           |           |           |               | (1,983-2,759)  | (1,513-2,168) | (327-800)     | (2,920-6,228)  | (2,288-3,568)  |
| Refugees & immigrants | -         | -         | -         | -         | -             | 257            | 257           | 314           | 254            | 270            |
|                       |           |           |           |           |               | (186-328)      | (186-328)     | (37-590)      | (145-362)      | (120-421)      |
| Mixed groups          | -         | -         | -         | -         | -             | 658            | 423           | -             | 336            | 1,198          |
|                       |           |           |           |           |               | (511-804)      | (309-538)     |               | (90-583)       | (935-1,460)    |

TB=Tuberculosis; HBC=High burden country; TB/HIV HBC=Tuberculosis/human immunodeficiency virus high burden country; HHC=household contact; PLHIV=People living with human immunodeficiency virus.

**Table 12. Sensitivity analysis for yield/prevalence ratio meta-analysis. References for excluded studies in superscript.**

|                         | General Populations |                                       |                   |                     |                  | At-Risk Groups      |                                           |                     |                     |                     |
|-------------------------|---------------------|---------------------------------------|-------------------|---------------------|------------------|---------------------|-------------------------------------------|---------------------|---------------------|---------------------|
|                         | Overall             | Excluding outliers <sup>68, 149</sup> | High risk of bias | Medium risk of bias | Low risk of bias | Overall             | Excluding outliers <sup>77, 96, 102</sup> | High risk of bias   | Medium risk of bias | Low risk of bias    |
| Overall                 | 1.4<br>(0.8-1.9)    | 1.1<br>(0.8-1.3)                      | 1.1<br>(0.5-1.7)  | 1.0<br>(0.7-1.4)    | 2.1<br>(0.5-3.7) | 12.5<br>(9.1-15.8)  | 11.7<br>(8.4-15.1)                        | 6.2<br>(3.7-8.7)    | 8.7<br>(5.1-12.2)   | 21.2<br>(13.4-29.0) |
| <b>Burden</b>           |                     |                                       |                   |                     |                  |                     |                                           |                     |                     |                     |
| Non-HBC                 | 1.3<br>(0.2-2.5)    | 1.3<br>(0.2-2.5)                      | -                 | 1.3<br>(0.2-2.5)    | -                | 9.2<br>(3.0-15.4)   | 9.2<br>(3.0-15.4)                         | 2.9<br>(1.6-4.1)    | 9.3<br>(1.8-16.8)   | 17.4<br>(0-38.2)    |
| HBC                     | 1.4<br>(0.8-2.0)    | 1.1<br>(0.8-1.3)                      | 1.1<br>(0.5-1.7)  | 1.0<br>(0.6-1.4)    | 2.1<br>(0.5-3.7) | 12.9<br>(9.2-16.6)  | 12.1<br>(8.3-15.8)                        | 6.8<br>(3.8-9.7)    | 8.6<br>(4.6-12.5)   | 21.6<br>(13.2)      |
| Non-TB/HIV HBC          | 0.9<br>(0.6-1.3)    | 0.9<br>(0.6-1.3)                      | 0.7<br>(0-1.4)    | 0.9<br>(0.3-1.5)    | 1.2<br>(1.1-1.3) | 7.9<br>(3.8-12.0)   | 6.4<br>(3.5-9.2)                          | 6.2<br>(0-14.0)     | 6.4<br>(2.2-10.6)   | 12.7<br>(0.1-25.2)  |
| TB/HIV HBC              | 1.6<br>(0.8-2.3)    | 1.1<br>(0.8-1.5)                      | 1.2<br>(0.5-1.9)  | 1.1<br>(0.6-1.6)    | 2.5<br>(0.3-4.7) | 13.9<br>(9.7-18.1)  | 13.4<br>(9.1-17.6)                        | 6.2<br>(3.5-8.9)    | 9.9<br>(4.9-14.8)   | 22.9<br>(13.9-31.9) |
| <b>Incidence</b>        |                     |                                       |                   |                     |                  |                     |                                           |                     |                     |                     |
| Low                     | -                   | -                                     | -                 | -                   | -                | -                   | -                                         | -                   | -                   | -                   |
| Moderate                | 1.0<br>(0.2-1.8)    | 1.0<br>(0.2-1.8)                      | -                 | 0.7<br>(0-1.4)      | 1.9<br>(1.8-1.9) | 35.1<br>(19.3-50.9) | 35.1<br>(19.3-50.9)                       | 23.7<br>(23.1-24.4) | 8.8<br>(3.1-14.5)   | 59.2<br>(42-76.4)   |
| Medium                  | 1.4<br>(0.6-2.2)    | 0.9<br>(0.7-1.2)                      | 0.7<br>(0.4-1.1)  | 1.2<br>(0.8-1.7)    | 2.4<br>(0.1-4.6) | 9.1<br>(6.5-11.7)   | 7.8<br>(5.5-10.0)                         | 5.7<br>(2.8-8.6)    | 8.5<br>(4.2-12.7)   | 12.5<br>(7.1-17.9)  |
| High                    | 1.5<br>(0.7-2.3)    | 1.5<br>(0.7-2.3)                      | 2.0<br>(0.6-3.4)  | 0.6<br>(0.4-0.9)    | 1.5<br>(0.5-2.4) | 8.0<br>(3.6-12.5)   | 8.0<br>(3.6-12.5)                         | 5.2<br>(1.6-8.8)    | 9.1<br>(0-19.9)     | 10.3<br>(3.3-17.3)  |
| <b>Region</b>           |                     |                                       |                   |                     |                  |                     |                                           |                     |                     |                     |
| North America & Europe  | 0.2<br>(0.2-0.3)    | 0.2<br>(0.2-0.3)                      | -                 | 0.2<br>(0.2-0.3)    | -                | 6.5<br>(6.3-6.8)    | 6.5<br>(6.3-6.8)                          | -                   | 6.5<br>(6.3-6.8)    | -                   |
| Middle East             | 1.4<br>(0.8-2.1)    | 1.4<br>(0.8-2.1)                      | 1.5<br>(1.0-1.9)  | 1.4<br>(0.3-2.5)    | -                | 9.8<br>(0-19.7)     | 4.9<br>(2.3-7.5)                          | 3.0<br>(2.6-3.3)    | 4.4<br>(0.7-8.2)    | 15.5<br>(0-34.5)    |
| Asia                    | 1.3<br>(0.9-1.7)    | 1.3<br>(0.9-1.7)                      | 1.5<br>(0-3.1)    | 1.2<br>(0.7-1.7)    | 1.2<br>(0.9-1.6) | 8.0<br>(4.6-11.5)   | 7.3<br>(4.1-10.6)                         | 6.6<br>(0.4-12.7)   | 7.1<br>(2.5-11.7)   | 12.2<br>(3.1-21.2)  |
| South & Central America | -                   | -                                     | -                 | -                   | -                | 45.6<br>(27.5-63.7) | 45.6<br>(27.5-63.7)                       | -                   | 13.8<br>(6.3-21.4)  | 59.2<br>(42.0-76.4) |
| Africa                  | 1.5<br>(0.5-2.6)    | 0.9<br>(0.5-1.2)                      | 0.9<br>(0.3-1.5)  | 0.7<br>(0-1.4)      | 2.8<br>(0-5.6)   | 9.2<br>(6.2-12.2)   | 8.7<br>(5.8-11.6)                         | 6.2<br>(3.5-8.8)    | 10.6<br>(2.8-18.4)  | 11.2<br>(6.0-16.4)  |

| Group                 |   |   |   |   |   |                     |                     |                     |                    |                     |
|-----------------------|---|---|---|---|---|---------------------|---------------------|---------------------|--------------------|---------------------|
| Drug users            | - | - | - | - | - | 11.9<br>(11.1-12.7) | 11.9<br>(11.1-12.7) | 11.9<br>(11.1-12.7) | -                  | -                   |
| Health workers        | - | - | - | - | - | 19.4<br>(0-47.3)    | 5.2<br>(5.2-5.3)    | 5.2<br>(5.2-5.3)    | -                  | 33.6<br>(33.3-34.0) |
| Contacts/HHCs         | - | - | - | - | - | 8.0<br>(5.4-10.6)   | 7.2<br>(5.1-9.4)    | 7.5<br>(1.0-14.1)   | 9.8<br>(4.1-15.5)  | 6.8<br>(4.3-9.3)    |
| PLHIV                 | - | - | - | - | - | 19.7<br>(13.7-25.7) | 19.7<br>(13.7-25.7) | 12.3<br>(6.4-18.2)  | 22.3<br>(9.5-35.1) | 26.8<br>(16.7-37.0) |
| Poor & marginalized   | - | - | - | - | - | 3.0<br>(2.0-3.9)    | 3.0<br>(2.0-3.9)    | 2.1<br>(1.4-2.8)    | 3.1<br>(1.1-5.0)   | 5.2<br>(4.3-6.0)    |
| Prison inmates        | - | - | - | - | - | 25.2<br>(11.6-38.8) | 25.2<br>(11.6-38.8) | 1.7<br>(0.7-2.7)    | 10.3<br>(1.7-18.8) | 39.2<br>(19.6-58.7) |
| Refugees & immigrants | - | - | - | - | - | 1.1<br>(0.9-1.3)    | 1.1<br>(0.9-1.3)    | -                   | 1.1<br>(0.9-1.3)   | -                   |
| Mixed groups          | - | - | - | - | - | 8.8<br>(0-20.6)     | 3.0<br>(0-5.9)      | -                   | 1.6<br>(0.4-2.8)   | 27.0<br>(0-60.3)    |

**TB=Tuberculosis; HBC=High burden country; TB/HIV HBC=Tuberculosis/human immunodeficiency virus high burden country; HHC=household contact; PLHIV=People living with human immunodeficiency virus.**
