# Supplementary material
Source: HighWire-hosted journal article supplement (https://erj.ersjournals.com/content/58/4/2100090)
Supplement: inline-supplementary-material-8 [file inline-supplementary-material-8.pdf]

**REFERENCES**

1. Griffiths C, Sturdy P, Brewin P, Bothamley G, Eldridge S, Martineau A, et al. Educational outreach to promote screening for tuberculosis in primary care: a cluster randomised controlled trial. *Lancet*. 2007;369(9572):1528-34.
2. Rumman KA, Sabra NA, Bakri F, Seita A, Bassili A. Prevalence of tuberculosis suspects and their healthcare-seeking behavior in urban and rural Jordan. *Am J Trop Med Hyg*. 2008;79(4):545-51.
3. WHO. Global tuberculosis report 2019. Geneva: World Health Organization; 2019 2019.
4. Lönnroth K, Jaramillo E, Williams BG, Dye C, Raviglione M. Drivers of tuberculosis epidemics: The role of risk factors and social determinants. *Social Science & Medicine*. 2009;68(12):2240-6.
5. WHO. The End TB Strategy: Global strategy and targets for tuberculosis prevention, care and control after 2015. 2014.
6. Resolution 70/1, Transforming our World: the 2030 Agenda for Sustainable Development. United Nations General Assembly; 2015.
7. Bank TW. Tuberculosis case detection rate (% , all forms). 2018.
8. Lönnroth K, Corbett E, Golub J, Godfrey-Faussett P, Uplekar M, Weil D, et al. Systematic screening for active tuberculosis: rationale, definitions and key considerations. *Int J Tuberc Lung Dis*. 2013;17(3):289-98.
9. WHO. Systematic screening for active tuberculosis: principles and recommendations. 2013.
10. Mhimbira FA, Cuevas LE, Dacombe R, Mkopi A, Sinclair D. Interventions to increase tuberculosis case detection at primary healthcare or community-level services. *Cochrane Database Syst Rev*. 2017;11(11):Cd011432.
11. Kranzer K, Afnan-Holmes H, Tomlin K, Golub JE, Shapiro AE, Schaap A, et al. The benefits to communities and individuals of screening for active tuberculosis disease: a systematic review. *Int J Tuberc Lung Dis*. 2013;17(4):432-46.
12. Moher D, Shamseer L, Clarke M, Ghersi D, Liberati A, Petticrew M, et al. Preferred reporting items for systematic review and meta-analysis protocols (PRISMA-P) 2015 statement. *Systematic Reviews*. 2015;4(1):1.
13. Liberati A, Altman DG, Tetzlaff J, Mulrow C, Gøtzsche PC, Ioannidis JP, et al. The PRISMA statement for reporting systematic reviews and meta-analyses of studies that evaluate

- health care interventions: explanation and elaboration. *Ann Intern Med.* 2009;151(4):W65-94.
14. WHO. WHO Regional Offices [Available from: <https://www.who.int/about/who-we-are/regional-offices>].
  15. WHO. Use of high burden country lists for TB by WHO in the post-2015 era. 2015.
  16. WHO Tuberculosis Country Profiles [Internet]. Available from: <https://www.who.int/tb/country/data/profiles/en/>.
  17. Tuberculosis: Taiwan Centers for Disease Control; [Available from: [https://www.cdc.gov.tw/En/Category/ListContent/bg0g\\_VU\\_Ysrgkes\\_KRUDgQ?uaid=0WialNbsh7SEGERJLa29FA](https://www.cdc.gov.tw/En/Category/ListContent/bg0g_VU_Ysrgkes_KRUDgQ?uaid=0WialNbsh7SEGERJLa29FA)].
  18. Global Tuberculosis Control 2009 EPIDEMIOLOGY STRATEGY FINANCING. 2009.
  19. Hoy D, Brooks P, Woolf A, Blyth F, March L, Bain C, et al. Assessing risk of bias in prevalence studies: modification of an existing tool and evidence of interrater agreement. *J Clin Epidemiol.* 2012;65(9):934-9.
  20. Michael J Bradburn JJD, Douglas G Altman. Centre for Statistics in Medicine, University of Oxford, Wolfson College Annexe, Linton Road, Oxford, OX2 6UD, UK. Edited code from [Metan.adobe.com](http://www.metan.adobe.com).
  21. Riley RD, Higgins JPT, Deeks JJ. Interpretation of random effects meta-analyses. *BMJ.* 2011;342:d549.
  22. Cohen A, Mathiasen V, Schön T, Wejse C. The global prevalence of latent tuberculosis: a systematic review and meta-analysis. *European Respiratory Journal.* 2019.
  23. HIV Country Profiles [Internet]. 2021 [cited February 2021].
  24. Sarang A, Platt L, Vyshemirskaya I, Rhodes T. Prisons as a source of tuberculosis in Russia. *International Journal of Prisoner Health.* 2016;12:45-56.
  25. Shewade HD, Gupta V, Satyanarayana S, Pandey P, Bajpai UN, Tripathy JP, et al. Patient characteristics, health seeking and delays among new sputum smear positive TB patients identified through active case finding when compared to passive case finding in India. *PLOS ONE.* 2019;14(3):e0213345.
  26. Chen JO, Qiu YB, Rueda ZV, Hou JL, Lu KY, Chen LP, et al. Role of community-based active case finding in screening tuberculosis in Yunnan province of China. *Infect Dis Poverty.* 2019;8(1):92.

27. Uplekar M, Creswell J, Ottmani SE, Weil D, Sahu S, Lönnroth K. Programmatic approaches to screening for active tuberculosis. *Int J Tuberc Lung Dis.* 2013;17(10):1248-56.
28. Marks GB, Nguyen NV, Nguyen PTB, Nguyen TA, Nguyen HB, Tran KH, et al. Community-wide Screening for Tuberculosis in a High-Prevalence Setting. *N Engl J Med.* 2019;381(14):1347-57.
29. Cheng J, Wang L, Zhang H, Xia Y. Diagnostic value of symptom screening for pulmonary tuberculosis in China. *PLoS One.* 2015;10(5):e0127725.
30. van't Hoog AH, Meme HK, Laserson KF, Agaya JA, Muchiri BG, Githui WA, et al. Screening strategies for tuberculosis prevalence surveys: the value of chest radiography and symptoms. *PloS one.* 2012;7(7):e38691-e.
31. Ahmad Khan F, Verkuil S, Parrish A, Chikwava F, Ntumy R, El-Sadr W, et al. Performance of symptom-based tuberculosis screening among people living with HIV: not as great as hoped. *AIDS.* 2014;28(10):1463-72.
32. Sterling TR, Pham PA, Chaisson RE. HIV Infection—Related Tuberculosis: Clinical Manifestations and Treatment. *Clinical Infectious Diseases.* 2010;50(Supplement\_3):S223-S30.
33. Desikan P. Sputum smear microscopy in tuberculosis: is it still relevant? *Indian J Med Res.* 2013;137(3):442-4.
34. Harries AD, Maher D, Nunn P. An approach to the problems of diagnosing and treating adult smear-negative pulmonary tuberculosis in high-HIV-prevalence settings in sub-Saharan Africa. *Bull World Health Organ.* 1998;76(6):651-62.
35. Murphy K, Habib SS, Zaidi SMA, Khowaja S, Khan A, Melendez J, et al. Computer aided detection of tuberculosis on chest radiographs: An evaluation of the CAD4TB v6 system. *Scientific Reports.* 2020;10(1):5492.
36. Tuberculosis WEC, World Health O. WHO Expert Committee on Tuberculosis [meeting held in Geneva from 11 to 20 December 1973] : ninth report. Geneva: World Health Organization; 1974.
37. Abrahão RM, Nogueira PA, Malucelli MI. Tuberculosis in county jail prisoners in the western sector of the city of São Paulo, Brazil. *Int J Tuberc Lung Dis.* 2006;10(2):203-8.

38. Adane K, Spigt M, Ferede S, Asmelash T, Abebe M, Dinant GJ. Half of Pulmonary Tuberculosis Cases Were Left Undiagnosed in Prisons of the Tigray Region of Ethiopia: Implications for Tuberculosis Control. *PLoS One*. 2016;11(2):e0149453.
39. Akhtar S, White F, Hasan R, Rozi S, Younus M, Ahmed F, et al. Hyperendemic pulmonary tuberculosis in peri-urban areas of Karachi, Pakistan. *BMC Public Health*. 2007;7:70.
40. Al-Darraji HA, Altice FL, Kamarulzaman A. Undiagnosed pulmonary tuberculosis among prisoners in Malaysia: an overlooked risk for tuberculosis in the community. *Trop Med Int Health*. 2016;21(8):1049-58.
41. Alemayehu M, Gelaw B, Abate E, Wassie L, Belyhun Y, Bekele S, et al. Active tuberculosis case finding and detection of drug resistance among HIV-infected patients: A cross-sectional study in a TB endemic area, Gondar, Northwest Ethiopia. *Int J Mycobacteriol*. 2014;3(2):132-8.
42. Ali S, Haileamlak A, Wieser A, Pritsch M, Heinrich N, Loscher T, et al. Prevalence of Pulmonary Tuberculosis among Prison Inmates in Ethiopia, a Cross-Sectional Study. *PLoS One*. 2015;10(12):e0144040.
43. André E, Rusumba O, Evans CA, Ngongo P, Sanduku P, Elvis MM, et al. Patient-led active tuberculosis case-finding in the Democratic Republic of the Congo. *Bull World Health Organ*. 2018;96(8):522-30.
44. Anger HA, Proops D, Harris TG, Li J, Kreiswirth BN, Shashkina E, et al. Active case finding and prevention of tuberculosis among a cohort of contacts exposed to infectious tuberculosis cases in New York City. *Clin Infect Dis*. 2012;54(9):1287-95.
45. Aunsborg JW, Honge BL, Jespersen S, Rudolf F, Medina C, Correia FG, et al. A clinical score has utility in tuberculosis case-finding among patients with HIV: A feasibility study from Bissau. *Int J Infect Dis*. 2020;92s:S78-s84.
46. Aye S, Majumdar SS, Oo MM, Tripathy JP, Satyanarayana S, Kyaw NTT, et al. Evaluation of a tuberculosis active case finding project in peri-urban areas, Myanmar: 2014-2016. *Int J Infect Dis*. 2018;70:93-100.
47. Ayles H, Muyoyeta M, Du Toit E, Schaap A, Floyd S, Simwinga M, et al. Effect of household and community interventions on the burden of tuberculosis in southern Africa: the ZAMSTAR community-randomised trial. *Lancet*. 2013;382(9899):1183-94.

48. Ayles H, Schaap A, Nota A, Sismanidis C, Tembwe R, De Haas P, et al. Prevalence of tuberculosis, HIV and respiratory symptoms in two Zambian communities: implications for tuberculosis control in the era of HIV. *PLoS One*. 2009;4(5):e5602.
49. Badiaga S, Richet H, Azas P, Zandotti C, Rey F, Charrel R, et al. Contribution of a shelter-based survey for screening respiratory diseases in the homeless. *Eur J Public Health*. 2009;19(2):157-60.
50. Balcha TT, Sturegård E, Winqvist N, Skogmar S, Reepalu A, Jemal ZH, et al. Intensified tuberculosis case-finding in HIV-positive adults managed at Ethiopian health centers: diagnostic yield of Xpert MTB/RIF compared with smear microscopy and liquid culture. *PLoS One*. 2014;9(1):e85478.
51. Banu S, Rahman MT, Uddin MK, Khatun R, Khan MS, Rahman MM, et al. Effect of active case finding on prevalence and transmission of pulmonary tuberculosis in Dhaka Central Jail, Bangladesh. *PLoS One*. 2015;10(5):e0124976.
52. Banu S, Rahman MT, Uddin MK, Khatun R, Ahmed T, Rahman MM, et al. Epidemiology of tuberculosis in an urban slum of Dhaka City, Bangladesh. *PLoS One*. 2013;8(10):e77721.
53. Banu S, Hossain A, Uddin MK, Uddin MR, Ahmed T, Khatun R, et al. Pulmonary tuberculosis and drug resistance in Dhaka central jail, the largest prison in Bangladesh. *PLoS One*. 2010;5(5):e10759.
54. Bassett IV, Wang B, Chetty S, Giddy J, Losina E, Mazibuko M, et al. Intensive tuberculosis screening for HIV-infected patients starting antiretroviral therapy in Durban, South Africa. *Clin Infect Dis*. 2010;51(7):823-9.
55. Berhe G, Enqueselassie F, Hailu E, Mekonnen W, Teklu T, Gebretsadik A, et al. Population-based prevalence survey of tuberculosis in the Tigray region of Ethiopia. *BMC Infect Dis*. 2013;13:448.
56. Beyanga M, Kidenya BR, Gerwing-Adima L, Ochodo E, Mshana SE, Kasang C. Investigation of household contacts of pulmonary tuberculosis patients increases case detection in Mwanza City, Tanzania. *BMC Infect Dis*. 2018;18(1):110.
57. Bhat J, Rao VG, Gopi PG, Yadav R, Selvakumar N, Tiwari B, et al. Prevalence of pulmonary tuberculosis amongst the tribal population of Madhya Pradesh, central India. *Int J Epidemiol*. 2009;38(4):1026-32.

58. Bjerregaard-Andersen M, da Silva ZJ, Ravn P, Ruhwald M, Andersen PL, Sodemann M, et al. Tuberculosis burden in an urban population: a cross sectional tuberculosis survey from Guinea Bissau. *BMC Infect Dis.* 2010;10:96.
59. Bogdanova E, Mariandyshev O, Hinderaker SG, Nikishova E, Kulizhskaya A, Sveshnikova O, et al. Mass screening for active case finding of pulmonary tuberculosis in the Russian Federation: how to save costs. *Int J Tuberc Lung Dis.* 2019;23(7):830-7.
60. Borgen K, Koster B, Meijer H, Kuyvenhoven V, van der Sande M, Cobelens F. Evaluation of a large-scale tuberculosis contact investigation in the Netherlands. *Eur Respir J.* 2008;32(2):419-25.
61. Bozorgmehr K, Preussler S, Wagner U, Joggerst B, Szecsenyi J, Razum O, et al. Using country of origin to inform targeted tuberculosis screening in asylum seekers: a modelling study of screening data in a German federal state, 2002-2015. *BMC Infect Dis.* 2019;19(1):304.
62. The effect of tuberculosis control in China. *Lancet.* 2004;364(9432):417-22.
63. Carbone Ada S, Paião DS, Sgarbi RV, Lemos EF, Cazanti RF, Ota MM, et al. Active and latent tuberculosis in Brazilian correctional facilities: a cross-sectional study. *BMC Infect Dis.* 2015;15:24.
64. Cavany SM, Sumner T, Vynnycky E, Flach C, White RG, Thomas HL, et al. An evaluation of tuberculosis contact investigations against national standards. *Thorax.* 2017;72(8):736-45.
65. Chen C, Yang CG, Gao X, Lu ZZ, Tang FX, Cheng J, et al. Community-based active case finding for tuberculosis in rural western China: a cross-sectional study. *Int J Tuberc Lung Dis.* 2017;21(11):1134-9.
66. Cheng S, Tollefson D, He G, Li Y, Guo H, Chai S, et al. Evaluating a framework for tuberculosis screening among healthcare workers in clinical settings, Inner Mongolia, China. *J Occup Med Toxicol.* 2018;13:11.
67. Chheng P, Nsereko M, Malone LL, Okware B, Zalwango S, Joloba M, et al. Tuberculosis case finding in first-degree relative contacts not living with index tuberculosis cases in Kampala, Uganda. *Clin Epidemiol.* 2015;7:411-9.
68. Corbett EL, Bandason T, Duong T, Dauya E, Makamure B, Churchyard GJ, et al. Comparison of two active case-finding strategies for community-based diagnosis of symptomatic smear-positive tuberculosis and control of infectious tuberculosis in Harare, Zimbabwe (DETECTB): a cluster-randomised trial. *Lancet.* 2010;376(9748):1244-53.

69. Corbett EL, Zezai A, Cheung YB, Bandason T, Dauya E, Munyati SS, et al. Provider-initiated symptom screening for tuberculosis in Zimbabwe: diagnostic value and the effect of HIV status. *Bull World Health Organ.* 2010;88(1):13-21.
70. Corbett EL, Bandason T, Cheung YB, Munyati S, Godfrey-Faussett P, Hayes R, et al. Epidemiology of tuberculosis in a high HIV prevalence population provided with enhanced diagnosis of symptomatic disease. *PLoS Med.* 2007;4(1):e22.
71. Cowger TL, Thai LH, Duong BD, Danyuttapolchai J, Kittimunkong S, Nhung NV, et al. Programmatic Evaluation of an Algorithm for Intensified Tuberculosis Case Finding and Isoniazid Preventive Therapy for People Living With HIV in Thailand and Vietnam. *J Acquir Immune Defic Syndr.* 2017;76(5):512-21.
72. Crepet A, Repetto E, Al Rousan A, Sané Schepisi M, Girardi E, Prestileo T, et al. Lessons learnt from TB screening in closed immigration centres in Italy. *Int Health.* 2016;8(5):324-9.
73. Creswell J, Khowaja S, Codlin A, Hashmi R, Rasheed E, Khan M, et al. An evaluation of systematic tuberculosis screening at private facilities in Karachi, Pakistan. *PLoS One.* 2014;9(4):e93858.
74. Dabhi PA, Thangakunam B, Gupta R, James P, Thomas N, Naik D, et al. Screening for prevalence of current TB disease and latent TB infection in type 2 diabetes mellitus patients attending a diabetic clinic in an Indian tertiary care hospital. *PLoS One.* 2020;15(6):e0233385.
75. Day JH, Charalambous S, Fielding KL, Hayes RJ, Churchyard GJ, Grant AD. Screening for tuberculosis prior to isoniazid preventive therapy among HIV-infected gold miners in South Africa. *Int J Tuberc Lung Dis.* 2006;10(5):523-9.
76. Delva GJ, Francois I, Claassen CW, Dorestan D, Bastien B, Medina-Moreno S, et al. Active Tuberculosis Case Finding in Port-au-Prince, Haiti: Experiences, Results, and Implications for Tuberculosis Control Programs. *Tuberc Res Treat.* 2016;2016:8020745.
77. Dememew ZG, Jerene D, Datiko DG, Hiruy N, Tadesse A, Moile T, et al. The yield of community-based tuberculosis and HIV among key populations in hotspot settings of Ethiopia: A cross-sectional implementation study. *PLoS One.* 2020;15(5):e0233730.

78. Demissie M, Zenebere B, Berhane Y, Lindtjorn B. A rapid survey to determine the prevalence of smear-positive tuberculosis in Addis Ababa. *Int J Tuberc Lung Dis.* 2002;6(7):580-4.
79. den Boon S, White NW, van Lill SW, Borgdorff MW, Verver S, Lombard CJ, et al. An evaluation of symptom and chest radiographic screening in tuberculosis prevalence surveys. *Int J Tuberc Lung Dis.* 2006;10(8):876-82.
80. Deribew A, Abebe G, Apers L, Abdissa A, Deribe F, Woldemichael K, et al. Prevalence of pulmonary TB and spoligotype pattern of *Mycobacterium tuberculosis* among TB suspects in a rural community in Southwest Ethiopia. *BMC Infect Dis.* 2012;12:54.
81. Dey A, Thekkur P, Ghosh A, Dasgupta T, Bandopadhyay S, Lahiri A, et al. Active Case Finding for Tuberculosis through TOUCH Agents in Selected High TB Burden Wards of Kolkata, India: A Mixed Methods Study on Outcomes and Implementation Challenges. *Trop Med Infect Dis.* 2019;4(4).
82. Dierberg KL, Dorjee K, Salvo F, Cronin WA, Boddy J, Cirillo D, et al. Improved Detection of Tuberculosis and Multidrug-Resistant Tuberculosis among Tibetan Refugees, India. *Emerg Infect Dis.* 2016;22(3):463-8.
83. Dolla C, Padmapriyadarsini C, Pradeep Menon A, Muniyandi M, Adinarayanan S, Sekar G, et al. Tuberculosis among the homeless in Chennai city, South India. *Trans R Soc Trop Med Hyg.* 2017;111(10):479-81.
84. Elden S, Lawes T, Kudsk-Iversen S, Vandelanotte J, Nkawanyana S, Welfare W, et al. Integrating intensified case finding of tuberculosis into HIV care: an evaluation from rural Swaziland. *BMC Health Serv Res.* 2011;11:118.
85. Erkens C, Slump E, Kamphorst M, Keizer S, van Gerven PJ, Bwire R, et al. Coverage and yield of entry and follow-up screening for tuberculosis among new immigrants. *Eur Respir J.* 2008;32(1):153-61.
86. Fatima R, Qadeer E, Enarson DA, Creswell J, Stevens RH, Hinderaker SG, et al. Success of active tuberculosis case detection among high-risk groups in urban slums in Pakistan. *Int J Tuberc Lung Dis.* 2014;18(9):1099-104.
87. Fatima R, Qadeer E, Yaqoob A, Haq MU, Majumdar SS, Shewade HD, et al. Extending 'Contact Tracing' into the Community within a 50-Metre Radius of an Index Tuberculosis



- Patient Using Xpert MTB/RIF in Urban, Pakistan: Did It Increase Case Detection? PLoS One. 2016;11(11):e0165813.
88. Fournet N, Sanchez A, Massari V, Penna L, Natal S, Biondi E, et al. Development and evaluation of tuberculosis screening scores in Brazilian prisons. *Public Health*. 2006;120(10):976-83.
  89. Fox GJ, Nhung NV, Sy DN, Hoa NLP, Anh LTN, Anh NT, et al. Household-Contact Investigation for Detection of Tuberculosis in Vietnam. *N Engl J Med*. 2018;378(3):221-9.
  90. Gashu Z, Jerene D, Ensermu M, Habte D, Melese M, Hiruy N, et al. The Yield of Community-Based "Retrospective" Tuberculosis Contact Investigation in a High Burden Setting in Ethiopia. *PLoS One*. 2016;11(8):e0160514.
  91. Goetsch U, Bellinger OK, Buettel KL, Gottschalk R. Tuberculosis among drug users and homeless persons: impact of voluntary X-ray investigation on active case finding. *Infection*. 2012;40(4):389-95.
  92. Gopi PG, Subramani R, Sadacharam K, Narayanan PR. Yield of pulmonary tuberculosis cases by employing two screening methods in a community survey. *Int J Tuberc Lung Dis*. 2006;10(3):343-5.
  93. Gounder CR, Wada NI, Kensler C, Violari A, McIntyre J, Chaisson RE, et al. Active tuberculosis case-finding among pregnant women presenting to antenatal clinics in Soweto, South Africa. *J Acquir Immune Defic Syndr*. 2011;57(4):e77-84.
  94. Gupta A, Mbwambo J, Mteza I, Shenoi S, Lambdin B, Nyandindi C, et al. Active case finding for tuberculosis among people who inject drugs on methadone treatment in Dar es Salaam, Tanzania. *Int J Tuberc Lung Dis*. 2014;18(7):793-8.
  95. Habeenzu C, Mitarai S, Lubasi D, Mudenda V, Kantenga T, Mwansa J, et al. Tuberculosis and multidrug resistance in Zambian prisons, 2000-2001. *Int J Tuberc Lung Dis*. 2007;11(11):1216-20.
  96. Habib SS, Rafiq S, Jamal WZ, Ayub SM, Ferrand RA, Khan A, et al. Engagement of private healthcare providers for case finding of tuberculosis and diabetes mellitus in Pakistan. *BMC Health Serv Res*. 2020;20(1):328.
  97. Hamusse S, Demissie M, Teshome D, Hassen MS, Lindtjørn B. Prevalence and Incidence of Smear-Positive Pulmonary Tuberculosis in the Hetosa District of Arsi Zone, Oromia Regional State of Central Ethiopia. *BMC Infect Dis*. 2017;17(1):214.

98. Harling R, Pearce M, Chandrakumar M, Mueller K, Hayward A. Tuberculosis screening of asylum seekers: 1 years' experience at the Dover Induction Centres. *Public Health*. 2007;121(11):822-7.
99. Hoa NB, Sy DN, Nhung NV, Tiemersma EW, Borgdorff MW, Cobelens FG. National survey of tuberculosis prevalence in Viet Nam. *Bull World Health Organ*. 2010;88(4):273-80.
100. Horie T, Lien LT, Tuan LA, Tuan PL, Sakurada S, Yanai H, et al. A survey of tuberculosis prevalence in Hanoi, Vietnam. *Int J Tuberc Lung Dis*. 2007;11(5):562-6.
101. Huang HY, Jou R, Chiang CY, Liu WC, Chiu HJ, Lee JJ. Nosocomial transmission of tuberculosis in two hospitals for mentally handicapped patients. *J Formos Med Assoc*. 2007;106(12):999-1006.
102. Imsanguan W, Bupachat S, Wanchaithanawong V, Luangjina S, Thawtheong S, Nedsuwan S, et al. Contact tracing for tuberculosis, Thailand. *Bull World Health Organ*. 2020;98(3):212-8.
103. Jackson-Sillah D, Hill PC, Fox A, Brookes RH, Donkor SA, Lugos MD, et al. Screening for tuberculosis among 2381 household contacts of sputum-smear-positive cases in The Gambia. *Trans R Soc Trop Med Hyg*. 2007;101(6):594-601.
104. James R, Khim K, Boudarene L, Yoong J, Phalla C, Saint S, et al. Tuberculosis active case finding in Cambodia: a pragmatic, cost-effectiveness comparison of three implementation models. *BMC Infect Dis*. 2017;17(1):580.
105. Jerene D, Melese M, Kassie Y, Alem G, Daba SH, Hiruye N, et al. The yield of a tuberculosis household contact investigation in two regions of Ethiopia. *Int J Tuberc Lung Dis*. 2015;19(8):898-903.
106. Jiménez-Fuentes MA, Augé CM, Gómez MN, Peiró JS, de Souza Galvao ML, Maldonado J, et al. Screening for active tuberculosis in high-risk groups. *Int J Tuberc Lung Dis*. 2014;18(12):1459-65.
107. John S, Gidado M, Dahiru T, Fanning A, Codlin AJ, Creswell J. Tuberculosis among nomads in Adamawa, Nigeria: outcomes from two years of active case finding. *Int J Tuberc Lung Dis*. 2015;19(4):463-8.
108. Kakinda M, Matovu JKB. A yield and cost comparison of tuberculosis contact investigation and intensified case finding in Uganda. *PLoS One*. 2020;15(6):e0234418.

109. Kali PB, Gray GE, Violari A, Chaisson RE, McIntyre JA, Martinson NA. Combining PMTCT with active case finding for tuberculosis. *J Acquir Immune Defic Syndr.* 2006;42(3):379-81.
110. Kamenska N, Nabirova D, Davtyan K, Davtyan H, Zachariah R, Aslanyan G. Strategies for active detection of tuberculosis in Ukraine: Comparative effectiveness amongst key populations (2014-2018). *J Infect Dev Ctries.* 2019;13(7.1):89s-94s.
111. Karamagi E, Sensalire S, Muhire M, Kisamba H, Byabagambi J, Rahimzai M, et al. Improving TB case notification in northern Uganda: evidence of a quality improvement-guided active case finding intervention. *BMC Health Serv Res.* 2018;18(1):954.
112. Karki B, Kittel G, Bolokon I, Jr., Duke T. Active Community-Based Case Finding for Tuberculosis With Limited Resources. *Asia Pac J Public Health.* 2017;29(1):17-27.
113. Kebede AH, Alebachew Z, Tsegaye F, Lemma E, Abebe A, Agonafir M, et al. The first population-based national tuberculosis prevalence survey in Ethiopia, 2010-2011. *Int J Tuberc Lung Dis.* 2014;18(6):635-9.
114. Kempker RR, Chkhartishvili N, Kinkladze I, Schechter MC, Harrington K, Rukhadze N, et al. High Yield of Active Tuberculosis Case Finding Among HIV-Infected Patients Using Xpert MTB/RIF Testing. *Open Forum Infect Dis.* 2019;6(6):ofz233.
115. Khaparde K, Jethani P, Dewan PK, Nair SA, Deshpande MR, Satyanarayana S, et al. Evaluation of TB Case Finding through Systematic Contact Investigation, Chhattisgarh, India. *Tuberc Res Treat.* 2015;2015:670167.
116. Khatana GH, Haq I, Khan SMS. Effectiveness, acceptance and feasibility of home-based intervention model for tuberculosis contact tracing in Kashmir. *J Clin Tuberc Other Mycobact Dis.* 2019;14:19-25.
117. Kigozi NG, Heunis JC, Engelbrecht MC. Yield of systematic household contact investigation for tuberculosis in a high-burden metropolitan district of South Africa. *BMC Public Health.* 2019;19(1):867.
118. Kilicaslan Z, Kiyani E, Kucuk C, Kumbetli S, Sarimurat N, Ozturk F, et al. Risk of active tuberculosis in adult household contacts of smear-positive pulmonary tuberculosis cases. *Int J Tuberc Lung Dis.* 2009;13(1):93-8.
119. Kimerling ME, Schuchter J, Chanthol E, Kunthy T, Stuer F, Glaziou P, et al. Prevalence of pulmonary tuberculosis among HIV-infected persons in a home care program in Phnom Penh, Cambodia. *Int J Tuberc Lung Dis.* 2002;6(11):988-94.

120. Kirkpatrick A, Bell C, Petrovic M, Woodhead M, Barrett A, Duffell E, et al. Investigation of a tuberculosis cluster at a job centre in Manchester, United Kingdom. *Euro Surveill.* 2006;11(11):273-5.
121. Kranzer K, Lawn SD, Meyer-Rath G, Vassall A, Radithalo E, Govindasamy D, et al. Feasibility, yield, and cost of active tuberculosis case finding linked to a mobile HIV service in Cape Town, South Africa: a cross-sectional study. *PLoS Med.* 2012;9(8):e1001281.
122. Lawn SD, Kerkhoff AD, Burton R, Schutz C, van Wyk G, Vogt M, et al. Rapid microbiological screening for tuberculosis in HIV-positive patients on the first day of acute hospital admission by systematic testing of urine samples using Xpert MTB/RIF: a prospective cohort in South Africa. *BMC Med.* 2015;13:192.
123. Lebina L, Fuller N, Osoba T, Scott L, Motlhaoleng K, Rakgokong M, et al. The Use of Xpert MTB/Rif for Active Case Finding among TB Contacts in North West Province, South Africa. *Tuberc Res Treat.* 2016;2016:4282313.
124. Lee S, Lau L, Lim K, Ferma J, Dodd W, Cole D. The Presence of Cough and Tuberculosis: Active Case Finding Outcomes in the Philippines. *Tuberc Res Treat.* 2019;2019:4578329.
125. Legesse M, Mamo G, Ameni G, Medhin G, Bjune G, Abebe F. Community-based prevalence of undiagnosed mycobacterial diseases in the Afar Region, north-east Ethiopia. *Int J Mycobacteriol.* 2013;2(2):94-102.
126. Leung CC, Chan CK, Tam CM, Yew WW, Kam KM, Au KF, et al. Chest radiograph screening for tuberculosis in a Hong Kong prison. *Int J Tuberc Lung Dis.* 2005;9(6):627-32.
127. Lewis JJ, Charalambous S, Day JH, Fielding KL, Grant AD, Hayes RJ, et al. HIV infection does not affect active case finding of tuberculosis in South African gold miners. *Am J Respir Crit Care Med.* 2009;180(12):1271-8.
128. Little KM, Msandiwa R, Martinson N, Golub J, Chaisson R, Dowdy D. Yield of household contact tracing for tuberculosis in rural South Africa. *BMC Infect Dis.* 2018;18(1):299.
129. Lorent N, Choun K, Thai S, Kim T, Huy S, Pe R, et al. Community-based active tuberculosis case finding in poor urban settlements of Phnom Penh, Cambodia: a feasible and effective strategy. *PLoS One.* 2014;9(3):e92754.
130. Mabuto T, Zwane E, Chihota V, Gresak G, Charalambous S, Churchyard GJ, et al. Tuberculosis active case finding: uptake and diagnostic yield among minibus drivers in urban South Africa. *BMC Public Health.* 2015;15:242.

131. Manzardo C, Treviño B, Gómez i Prat J, Cabezos J, Monguí E, Clavería I, et al. Communicable diseases in the immigrant population attended to in a tropical medicine unit: epidemiological aspects and public health issues. *Travel Med Infect Dis.* 2008;6(1-2):4-11.
132. Masur J, Koenig SP, Julma P, Ocheretina O, Duran-Mendicuti MA, Fitzgerald DW, et al. Active Tuberculosis Case Finding in Haiti. *Am J Trop Med Hyg.* 2017;97(2):433-5.
133. Matee M, Mtei L, Lounasvaara T, Wieland-Alter W, Waddell R, Lyimo J, et al. Sputum microscopy for the diagnosis of HIV-associated pulmonary tuberculosis in Tanzania. *BMC Public Health.* 2008;8:68.
134. Merid Y, Mulate YW, Hailu M, Hailu T, Habtamu G, Abebe M, et al. Population-based screening for pulmonary tuberculosis utilizing community health workers in Ethiopia. *Int J Infect Dis.* 2019;89:122-7.
135. Merid Y, Woldeamanuel Y, Abebe M, Datiko DG, Hailu T, Habtamu G, et al. High utility of active tuberculosis case finding in an Ethiopian prison. *Int J Tuberc Lung Dis.* 2018;22(5):524-9.
136. Middelkoop K, Bekker LG, Myer L, Whitelaw A, Grant A, Kaplan G, et al. Antiretroviral program associated with reduction in untreated prevalent tuberculosis in a South African township. *Am J Respir Crit Care Med.* 2010;182(8):1080-5.
137. Migambi P, Gasana M, Uwizeye CB, Kamanzi E, Ndahindwa V, Kalisvaart N, et al. Prevalence of tuberculosis in Rwanda: Results of the first nationwide survey in 2012 yielded important lessons for TB control. *PLoS One.* 2020;15(4):e0231372.
138. Miller AC, Golub JE, Cavalcante SC, Durovni B, Moulton LH, Fonseca Z, et al. Controlled trial of active tuberculosis case finding in a Brazilian favela. *Int J Tuberc Lung Dis.* 2010;14(6):720-6.
139. Mor Z, Weinstein O, Tischler-Aurkin D, Leventhal A, Alon Y, Grotto I. The yield of tuberculosis screening of undocumented migrants from the Horn of Africa based on chest radiography. *Isr Med Assoc J.* 2015;17(1):11-3.
140. Mor Z, Leventhal A, Weiler-Ravell D, Peled N, Lerman Y. Chest radiography validity in screening pulmonary tuberculosis in immigrants from a high-burden country. *Respir Care.* 2012;57(7):1137-44.

141. Morishita F, Garfin AM, Lew W, Oh KH, Yadav RP, Reston JC, et al. Bringing state-of-the-art diagnostics to vulnerable populations: The use of a mobile screening unit in active case finding for tuberculosis in Palawan, the Philippines. *PLoS One*. 2017;12(2):e0171310.
142. Mugisha B, Bock N, Mermin J, Odeke RM, Miller B, Adatu-Engwau F, et al. Tuberculosis case finding and preventive therapy in an HIV voluntary counseling and testing center in Uganda. *Int J Tuberc Lung Dis*. 2006;10(7):761-7.
143. Mwansa-Kambafwile J, McCarthy K, Gharbaharan V, Venter FW, Maitshotlo B, Black A. Tuberculosis case finding: evaluation of a paper slip method to trace contacts. *PLoS One*. 2013;8(9):e75757.
144. Nachega J, Coetzee J, Adendorff T, Msandiwa R, Gray GE, McIntyre JA, et al. Tuberculosis active case-finding in a mother-to-child HIV transmission prevention programme in Soweto, South Africa. *AIDS*. 2003;17(9):1398-400.
145. Nair D, Rajshekhar N, Kinton JS, Watson B, Velayutham B, Tripathy JP, et al. Household Contact Screening and Yield of Tuberculosis Cases-A Clinic Based Study in Chennai, South India. *PLoS One*. 2016;11(9):e0162090.
146. Ngadaya ES, Mfinanga GS, Wandwalo ER, Morkve O. Detection of pulmonary tuberculosis among patients with cough attending outpatient departments in Dar Es Salaam, Tanzania: does duration of cough matter? *BMC Health Serv Res*. 2009;9:112.
147. Noeske J, Kuaban C, Amougou G, Piubello A, Pouillot R. Pulmonary tuberculosis in the Central Prison of Douala, Cameroon. *East Afr Med J*. 2006;83(1):25-30.
148. Nogueira PA, Abrahão RM, Galesi VM. Tuberculosis and latent tuberculosis in prison inmates. *Rev Saude Publica*. 2012;46(1):119-27.
149. Ogbudebe CL, Chukwu JN, Nwafor CC, Meka AO, Ekeke N, Madichie NO, et al. Reaching the underserved: Active tuberculosis case finding in urban slums in southeastern Nigeria. *Int J Mycobacteriol*. 2015;4(1):18-24.
150. Ohene SA, Bonsu F, Hanson-Nortey NN, Sackey A, Danso S, Afutu F, et al. Yield of tuberculosis among household contacts of tuberculosis patients in Accra, Ghana. *Infect Dis Poverty*. 2018;7(1):14.
151. Oshi DC, Omeje JC, Oshi SN, Alobu IN, Chukwu NE, Nwokocha C, et al. An evaluation of innovative community-based approaches and systematic tuberculosis screening to

- improve tuberculosis case detection in Ebonyi State, Nigeria. *Int J Mycobacteriol.* 2017;6(3):246-52.
152. Page-Shipp L, Stevens W, Clark D, Scott L, Olsen F, Kisbey-Green H, et al. Successes, challenges and lessons from a novel deployment of Xpert(®) MTB/RIF at a major South African public event [Short Communication]. *Int J Tuberc Lung Dis.* 2014;18(4):438-40.
153. Pelissari DM, Kuhleis DC, Bartholomay P, Barreira D, Oliveira CLP, de Jesus RS, et al. Prevalence and screening of active tuberculosis in a prison in the South of Brazil. *Int J Tuberc Lung Dis.* 2018;22(10):1166-71.
154. Plant AJ, Watkins RE, Motus N, Jones W, O'Rourke T, Streeton J, et al. Results of tuberculosis screening in applicants for migration in Vietnam and Cambodia. *Int J Tuberc Lung Dis.* 2005;9(2):157-63.
155. Pontarelli A, Marchese V, Scolari C, Capone S, El-Hamad I, Donato F, et al. Screening for active and latent tuberculosis among asylum seekers in Italy: A retrospective cohort analysis. *Travel Med Infect Dis.* 2019;27:39-45.
156. Qian HZ, Li Q, Yao H, Ruan Y, Kristensen S, Schumacher JE, et al. Tuberculosis co-morbidity and perceptions about health care among HIV-infected plasma donors in rural China. *Southeast Asian J Trop Med Public Health.* 2009;40(1):108-12.
157. Rao NA. Prevalence of pulmonary tuberculosis in Karachi central prison. *J Pak Med Assoc.* 2004;54(8):413-5.
158. Rao VG, Bhat J, Yadav R, Gopalan GP, Nagamiah S, Bhondeley MK, et al. Prevalence of pulmonary tuberculosis--a baseline survey in central India. *PLoS One.* 2012;7(8):e43225.
159. Rao VG, Gopi PG, Bhat J, Selvakumar N, Yadav R, Tiwari B, et al. Pulmonary tuberculosis: a public health problem amongst the Saharia, a primitive tribe of Madhya Pradesh, Central India. *Int J Infect Dis.* 2010;14(8):e713-6.
160. Reddy KP, Brady MF, Gilman RH, Coronel J, Navincopa M, Ticona E, et al. Microscopic observation drug susceptibility assay for tuberculosis screening before isoniazid preventive therapy in HIV-infected persons. *Clin Infect Dis.* 2010;50(7):988-96.
161. Rekha Devi K, Narain K, Mahanta J, Deori R, Lego K, Goswami D, et al. Active detection of tuberculosis and paragonimiasis in the remote areas in North-Eastern India using cough as a simple indicator. *Pathog Glob Health.* 2013;107(3):153-6.

162. Rivera VR, Jean-Juste MA, Gluck SC, Reeder HT, Sainristil J, Julma P, et al. Diagnostic yield of active case finding for tuberculosis and HIV at the household level in slums in Haiti. *Int J Tuberc Lung Dis.* 2017;21(11):1140-6.
163. Romero-Sandoval NC, Flores-Carrera OF, Sánchez-Pérez HJ, Sánchez-Pérez I, Mateo MM. Pulmonary tuberculosis in an indigenous community in the mountains of Ecuador. *Int J Tuberc Lung Dis.* 2007;11(5):550-5.
164. Sanaie A, Mergenthaler C, Nasrat A, Seddiq MK, Mahmoodi SD, Stevens RH, et al. An Evaluation of Passive and Active Approaches to Improve Tuberculosis Notifications in Afghanistan. *PLoS One.* 2016;11(10):e0163813.
165. Sanchez A, Larouzé B, Espinola AB, Pires J, Capone D, Gerhardt G, et al. Screening for tuberculosis on admission to highly endemic prisons? The case of Rio de Janeiro State prisons. *Int J Tuberc Lung Dis.* 2009;13(10):1247-52.
166. Sanchez A, Gerhardt G, Natal S, Capone D, Espinola A, Costa W, et al. Prevalence of pulmonary tuberculosis and comparative evaluation of screening strategies in a Brazilian prison. *Int J Tuberc Lung Dis.* 2005;9(6):633-9.
167. Santha T, Garg R, Subramani R, Chandrasekaran V, Selvakumar N, Sisodia RS, et al. Comparison of cough of 2 and 3 weeks to improve detection of smear-positive tuberculosis cases among out-patients in India. *Int J Tuberc Lung Dis.* 2005;9(1):61-8.
168. Santos ADS, Oliveira RD, Lemos EF, Lima F, Cohen T, Cords O, et al. Yield, Efficiency and Costs of Mass Screening Algorithms for Tuberculosis in Brazilian Prisons. *Clin Infect Dis.* 2020.
169. Saunders MJ, Tovar MA, Collier D, Baldwin MR, Montoya R, Valencia TR, et al. Active and passive case-finding in tuberculosis-affected households in Peru: a 10-year prospective cohort study. *Lancet Infect Dis.* 2019;19(5):519-28.
170. Schepisi MS, Gualano G, Piselli P, Mazza M, D'Angelo D, Fasciani F, et al. Active Tuberculosis Case Finding Interventions Among Immigrants, Refugees and Asylum Seekers in Italy. *Infect Dis Rep.* 2016;8(2):6594.
171. Sculier D, Vannarith C, Pe R, Thai S, Kanara N, Borann S, et al. Performance of abdominal ultrasound for diagnosis of tuberculosis in HIV-infected persons living in Cambodia. *J Acquir Immune Defic Syndr.* 2010;55(4):500-2.



172. Sekandi JN, List J, Luzze H, Yin XP, Dobbin K, Corso PS, et al. Yield of undetected tuberculosis and human immunodeficiency virus coinfection from active case finding in urban Uganda. *Int J Tuberc Lung Dis.* 2014;18(1):13-9.
173. Sekandi JN, Neuhauser D, Smyth K, Whalen CC. Active case finding of undetected tuberculosis among chronic coughers in a slum setting in Kampala, Uganda. *Int J Tuberc Lung Dis.* 2009;13(4):508-13.
174. Sengai T, Timire C, Harries AD, Tweya H, Kavenga F, Shumba G, et al. Mobile targeted screening for tuberculosis in Zimbabwe: diagnosis, linkage to care and treatment outcomes. *Public Health Action.* 2019;9(4):159-65.
175. Shah SA, Qayyum S, Abro R, Baig S, Creswell J. Active contact investigation and treatment support: an integrated approach in rural and urban Sindh, Pakistan. *Int J Tuberc Lung Dis.* 2013;17(12):1569-74.
176. Shah NS, Anh MH, Thuy TT, Duong Thom BS, Linh T, Nghia DT, et al. Population-based chest X-ray screening for pulmonary tuberculosis in people living with HIV/AIDS, An Giang, Vietnam. *Int J Tuberc Lung Dis.* 2008;12(4):404-10.
177. Shapiro AE, Variava E, Rakgokong MH, Moodley N, Luke B, Salimi S, et al. Community-based targeted case finding for tuberculosis and HIV in household contacts of patients with tuberculosis in South Africa. *Am J Respir Crit Care Med.* 2012;185(10):1110-6.
178. Shargie EB, Yassin MA, Lindtjørn B. Prevalence of smear-positive pulmonary tuberculosis in a rural district of Ethiopia. *Int J Tuberc Lung Dis.* 2006;10(1):87-92.
179. Shenoi SV, Moll AP, Brooks RP, Kyriakides T, Andrews L, Kompala T, et al. Integrated Tuberculosis/Human Immunodeficiency Virus Community-Based Case Finding in Rural South Africa: Implications for Tuberculosis Control Efforts. *Open Forum Infect Dis.* 2017;4(3):ofx092.
180. Shriraam V, Srihari R, Gayathri T, Murali L. Active case finding for Tuberculosis among migrant brick kiln workers in South India. *Indian J Tuberc.* 2020;67(1):38-42.
181. Soemantri S, Senewe FP, Tjandrarini DH, Day R, Basri C, Manissero D, et al. Three-fold reduction in the prevalence of tuberculosis over 25 years in Indonesia. *Int J Tuberc Lung Dis.* 2007;11(4):398-404.
182. Ssemmondo E, Mwangwa F, Kironde JL, Kwarisiima D, Clark TD, Marquez C, et al. Implementation and Operational Research: Population-Based Active Tuberculosis Case

- Finding During Large-Scale Mobile HIV Testing Campaigns in Rural Uganda. *J Acquir Immune Defic Syndr.* 2016;73(3):e46-e50.
183. Su SB, Chiu CF, Chang CT, Chen KT, Lin CY, Guo HR. Screening for pulmonary tuberculosis using chest radiography in new employees in an industrial park in Taiwan. *Am J Infect Control.* 2007;35(4):254-9.
184. Tefera F, Barnabee G, Sharma A, Feleke B, Atnafu D, Haymanot N, et al. Evaluation of facility and community-based active household tuberculosis contact investigation in Ethiopia: a cross-sectional study. *BMC Health Serv Res.* 2019;19(1):234.
185. Thind D, Charalambous S, Tongman A, Churchyard G, Grant AD. An evaluation of 'Ribolola': a household tuberculosis contact tracing programme in North West Province, South Africa. *Int J Tuberc Lung Dis.* 2012;16(12):1643-8.
186. Thorson A, Hoa NP, Long NH, Allebeck P, Diwan VK. Do women with tuberculosis have a lower likelihood of getting diagnosed? Prevalence and case detection of sputum smear positive pulmonary TB, a population-based study from Vietnam. *J Clin Epidemiol.* 2004;57(4):398-402.
187. Tripodi D, Brunet-Courtois B, Nael V, Audrain M, Chailleux E, Germaud P, et al. Evaluation of the tuberculin skin test and the interferon-gamma release assay for TB screening in French healthcare workers. *J Occup Med Toxicol.* 2009;4:30.
188. Tupasi TE, Radhakrishna S, Chua JA, Mangubat NV, Guilatco R, Galipot M, et al. Significant decline in the tuberculosis burden in the Philippines ten years after initiating DOTS. *Int J Tuberc Lung Dis.* 2009;13(10):1224-30.
189. Van Duc L, Vree M, Cobelens FG, Phuc LT, Sy DN. High tuberculosis prevalence in a psychiatric hospital in Vietnam. *Int J Tuberc Lung Dis.* 2008;12(6):686-8.
190. Verver S, Kapata N, Simpungwe MK, Kaminsa S, Mwale M, Mukwangole C, et al. Feasibility of district wide screening of health care workers for tuberculosis in Zambia. *BMC Public Health.* 2017;18(1):17.
191. Vieira AA, Ribeiro SA, de Siqueira AM, Galesi VM, dos Santos LA, Golub JE. Prevalence of patients with respiratory symptoms through active case finding and diagnosis of pulmonary tuberculosis among prisoners and related predictors in a jail in the city of Carapicuíba, Brazil. *Rev Bras Epidemiol.* 2010;13(4):641-50.

192. Vijayageetha M, Kumar AM, Ramakrishnan J, Sarkar S, Papa D, Mehta K, et al. Tuberculosis screening among pregnant women attending a tertiary care hospital in Puducherry, South India: is it worth the effort? *Glob Health Action*. 2019;12(1):1564488.
193. Vo LNQ, Forse RJ, Codlin AJ, Vu TN, Le GT, Do GC, et al. A comparative impact evaluation of two human resource models for community-based active tuberculosis case finding in Ho Chi Minh City, Viet Nam. *BMC Public Health*. 2020;20(1):934.
194. Volkmann T, Okelloh D, Agaya J, Cain K, Ooko B, Malika T, et al. Pilot implementation of a contact tracing intervention for tuberculosis case detection in Kisumu County, Kenya. *Public Health Action*. 2016;6(4):217-9.
195. Vyas A, Creswell J, Codlin AJ, Stevens R, Rao VG, Kumar B, et al. Community-based active case-finding to reach the most vulnerable: tuberculosis in tribal areas of India. *Int J Tuberc Lung Dis*. 2019;23(6):750-5.
196. Wali A, Khan D, Safdar N, Shawani Z, Fatima R, Yaqoob A, et al. Prevalence of tuberculosis, HIV/AIDS, and hepatitis; in a prison of Balochistan: a cross-sectional survey. *BMC Public Health*. 2019;19(1):1631.
197. Wang FD, Chang CH, Su WJ, Shih JF, Hsiao KM, Chern MS, et al. Screening of hospital workers for pulmonary tuberculosis in a medical center in Taiwan. *Infect Control Hosp Epidemiol*. 2006;27(5):510-1.
198. Wei X, Zou G, Chong MK, Xu L. An intervention of active TB case finding among smokers attending routine primary care facilities in China: an exploratory study. *Trans R Soc Trop Med Hyg*. 2015;109(9):545-52.
199. Weinrich JM, Diel R, Sauer M, Henes FO, Meywald-Walter K, Adam G, et al. Yield of chest X-ray tuberculosis screening of immigrants during the European refugee crisis of 2015: a single-centre experience. *Eur Radiol*. 2017;27(8):3244-8.
200. Whalen CC, Zalwango S, Chiunda A, Malone L, Eisenach K, Joloba M, et al. Secondary attack rate of tuberculosis in urban households in Kampala, Uganda. *PLoS One*. 2011;6(2):e16137.
201. Wood R, Middelkoop K, Myer L, Grant AD, Whitelaw A, Lawn SD, et al. Undiagnosed tuberculosis in a community with high HIV prevalence: implications for tuberculosis control. *Am J Respir Crit Care Med*. 2007;175(1):87-93.
202. Wu HY, Su FH, Liu SC, Sung KY, Chang HJ, Liu YH. Analysis of the health status of foreign brides in a community hospital in Taipei County. *Chang Gung Med J*. 2004;27(12):894-902.

203. Yassin MA, Datiko DG, Tulloch O, Markos P, Aschalew M, Shargie EB, et al. Innovative community-based approaches doubled tuberculosis case notification and improve treatment outcome in Southern Ethiopia. *PLoS One*. 2013;8(5):e63174.
204. Yimer S, Holm-Hansen C, Yimaldu T, Bjune G. Evaluating an active case-finding strategy to identify smear-positive tuberculosis in rural Ethiopia. *Int J Tuberc Lung Dis*. 2009;13(11):1399-404.
205. Yoon C, Semitala FC, Asege L, Katende J, Mwebe S, Andama AO, et al. Yield and Efficiency of Novel Intensified Tuberculosis Case-Finding Algorithms for People Living with HIV. *Am J Respir Crit Care Med*. 2019;199(5):643-50.
206. Zachariah R, Spielmann MP, Harries AD, Gomani P, Graham SM, Bakali E, et al. Passive versus active tuberculosis case finding and isoniazid preventive therapy among household contacts in a rural district of Malawi. *Int J Tuberc Lung Dis*. 2003;7(11):1033-9.
207. Zaman K, Yunus M, Arifeen SE, Baqui AH, Sack DA, Hossain S, et al. Prevalence of sputum smear-positive tuberculosis in a rural area in Bangladesh. *Epidemiol Infect*. 2006;134(5):1052-9.
208. Zhang X, Wei X, Zou G, Walley J, Zhang H, Guo X, et al. Evaluation of active tuberculosis case finding through symptom screening and sputum microscopy of close contacts in Shandong, China. *Trop Med Int Health*. 2011;16(12):1511-7.
